# Supplementary material
Source: publisher figshare collection journal article supplement (https://gsajournals.figshare.com/ndownloader/files/36988921)
Supplement: Supplementary file 1 [file 36988921]

	gene	baseMean	log2FoldChange	lfcSE	stat	pvalue	padj
1	21ur-10697	33.66514849	-1.985834421	0.626291804	-3.160773711	0.001573507	0.028827984
2	21ur-14295	28.48578316	-2.615019519	0.764023263	-3.437608403	0.000586876	0.015379717
3	21ur-1600	134.1158539	-2.687012358	0.724152996	-3.758097048	0.00017121	0.00659971
4	B0024.4	4873.328814	-2.331858604	0.523060323	-4.460128272	8.19E-06	0.000702684
5	B0034.1	129.5438444	-1.657599391	0.500211892	-3.310750282	0.000930462	0.020866857
6	B0035.13	30149.21587	-1.578341133	0.30588169	-5.159981684	2.47E-07	4.86E-05
7	B0035.21	35.37017594	-1.584906329	0.455277237	-3.466156759	0.000527955	0.014451119
8	B0213.24	7.87158684	2.204080583	0.7339262	2.928069365	0.003410739	0.047504892
9	B0222.10	71.30789243	1.609549236	0.530562948	3.028631987	0.002456637	0.03799222
10	B0272.4	418.5351377	1.897885758	0.404683601	4.688949799	2.75E-06	0.000312624
11	B0281.5	23.84811582	-2.478810707	0.785373601	-3.282682739	0.001028243	0.021969668
12	B0310.6	623.3594533	-1.831711379	0.470281612	-3.894690793	9.83E-05	0.004454237
13	B0334.13	691.7519061	-3.231201101	0.691059105	-4.729028383	2.26E-06	0.000270432
14	B0403.5	475.0766803	-2.302978816	0.651529646	-3.545271407	0.000392209	0.011891751
15	B0454.8	65.54821109	-2.041406235	0.555590044	-3.671429357	0.000241198	0.008461086
16	B0511.11	557.6469639	-1.695529043	0.461979387	-3.67015198	0.000242406	0.008462468
17	B0513.4	1375.428471	-2.373292751	0.626097582	-3.799718638	0.00014486	0.005892403
18	B0563.10	37.68644531	-2.672091291	0.738297551	-3.641003925	0.000271577	0.00918844
19	C01B10.44	36.67233454	-2.621629365	0.464679677	-5.559425008	2.71E-08	9.07E-06
20	C02E7.7	4776.985238	-2.065953678	0.659334841	-3.143191856	0.001671163	0.030129199
21	C03C10.2	131.4140368	-1.656264766	0.337513209	-4.903259138	9.43E-07	0.000141253
22	C03G6.6	63.13376573	-3.698495281	0.674522488	-5.351863671	8.71E-08	2.32E-05
23	C04B4.2	48.92847336	-2.264604025	0.769791593	-3.028487317	0.002457814	0.03799222
24	C04E7.5	16.55659898	-2.098027259	0.791723589	-3.156462535	0.001596954	0.029227972
25	C04G6.2	5262.512883	-2.181522726	0.655547821	-3.338822629	0.000841343	0.019869173
26	C05B5.2	3935.005894	-1.819788155	0.536471401	-3.393489711	0.000690082	0.017229194
27	C05C8.1	956.4966595	-1.806480173	0.224664196	-8.039414307	9.03E-16	1.82E-12
28	C05E7.2	2866.014482	-3.356578586	0.669181489	-5.064816173	4.09E-07	7.18E-05
29	C06A1.6	53.48779257	-2.929909758	0.746351882	-3.994659832	6.48E-05	0.003341063
30	C06A1.7	113.8113795	-2.91179805	0.632195691	-4.598045565	4.26E-06	0.000446219
31	C06B3.1	61.82738054	2.453435988	0.771475407	3.30548349	0.000948127	0.02105338
32	C06B3.16	11.76621129	-2.442134824	0.704295374	-3.331174932	0.000864802	0.020043262
33	C06C6.7	286.1487619	-2.040234993	0.570325999	-3.57941009	0.000344371	0.010916732
34	C06C6.8	179.0378765	-2.205437558	0.458879508	-4.802221605	1.57E-06	0.000200022
35	C06E8.5	306.7255438	-2.83050976	0.667819423	-4.256839692	2.07E-05	0.001426998
36	C08B6.14	15.60035615	2.055417383	0.674087342	3.029079942	0.002452998	0.037982644
37	C08E8.10	30.88606843	2.017170523	0.531587757	3.778379149	0.000157852	0.006252269
38	C08F1.11	10.51556988	1.871650885	0.778308402	3.18017475	0.001471863	0.027752277
39	C09B8.4	140.2314859	1.884675677	0.599334793	3.145770877	0.001656497	0.029962954
40	C10A4.4	29.74733912	-2.239658197	0.767319249	-2.956911746	0.00310737	0.044534056
41	C10C5.4	972.8363408	-1.663970517	0.535768852	-3.106390369	0.001893865	0.032586363
42	C10F3.7	113.1430536	-2.456215667	0.560321988	-4.374365124	1.22E-05	0.00093015
43	C10G11.8	7548.981341	-1.538271106	0.485970242	-3.165784987	0.001546651	0.02862569
44	C10G8.3	180.283034	-2.815295665	0.612410443	-4.601577612	4.19E-06	0.000441268
45	C10H11.7	292.1828463	-1.661525628	0.569224465	-2.920555408	0.003494081	0.048353481
46	C11E4.7	282.6572051	-3.110081217	0.682363924	-4.585908809	4.52E-06	0.000467539
47	C13A2.9	30.09970847	-3.893713536	0.691435525	-5.076811719	3.84E-07	6.88E-05
48	C14F11.4	6559.581558	-2.152590241	0.684439669	-3.161084318	0.00157183	0.028827984
49	C15A11.4	183.3529855	-2.353656796	0.694402262	-3.407804273	0.000654879	0.016648814
50	C15F1.1	312.3475141	-1.765317375	0.56335574	-3.134150447	0.001723525	0.030827589
51	C16D9.5	899.1796315	-1.770902741	0.399771465	-4.429600867	9.44E-06	0.00077676
52	C17B7.5	1885.385037	2.776280824	0.640160823	4.354110695	1.34E-05	0.001003503
53	C17E7.4	26.60463164	-2.376516955	0.793152188	-3.269641823	0.001076837	0.022430189
54	C17F3.1	2206.578326	-1.671201918	0.566120494	-2.953595949	0.00314095	0.044836825
55	C17F4.12	434.2873641	-3.203555465	0.404564706	-7.905819757	2.66E-15	4.38E-12
56	C17F4.3	241.0348925	-2.687802846	0.639469708	-4.213074145	2.52E-05	0.001652164
57	C17G1.2	164.1767357	-2.527718143	0.705913575	-3.606890909	0.000309888	0.010125055
58	C17H12.12	1237.146408	-1.759124815	0.482875631	-3.643470171	0.000268987	0.009152125
59	C18E9.7	178.4509576	-1.943456276	0.432583257	-4.488380918	7.18E-06	0.000639924
60	C18G1.9	197.0532971	-1.929600831	0.460028551	-4.191810776	2.77E-05	0.001782638
61	C23G10.11	40.36571806	-1.789137914	0.60932493	-2.919745759	0.003503171	0.04840526
62	C23H4.3	1080.349093	-1.584353912	0.340826905	-4.648275425	3.35E-06	0.000376323
63	C25E10.17	67.02668528	-1.589249475	0.478855194	-3.313380995	0.000921753	0.020777902
64	C26C6.4	68.8214541	-1.562206372	0.531360574	-2.933304456	0.003353748	0.046960934
65	C26C6.6	277.3729512	-1.931473507	0.552236082	-3.49886374	0.000467245	0.013424773
66	C26E6.1	31.85656381	-2.041052833	0.676936964	-3.01640779	0.00255789	0.03910504
67	C26F1.1	668.9808668	-2.45371781	0.538020654	-4.561606153	5.08E-06	0.000509687
68	C27A7.6	556.453791	-2.006786214	0.629640953	-3.192188471	0.001411992	0.026931993
69	C27D9.2	648.4193963	-3.00997085	0.676008106	-4.485110479	7.29E-06	0.000644155
70	C28D4.4	298.3480523	-1.785113699	0.408414589	-4.369336172	1.25E-05	0.000946721
71	C28D4.5	1172.197498	-1.748419016	0.494188155	-3.538517183	0.000402381	0.012058775
72	C28D4.7	1187.253706	-1.982920967	0.510754757	-3.883327393	0.000103037	0.004627958
73	C28D4.8	283.4393832	-2.211156425	0.370512778	-5.963375619	2.47E-09	1.09E-06
74	C30G12.3	14.47870658	2.438627335	0.614697083	3.874002306	0.000107062	0.004773243
75	C30H6.5	2981.219847	-3.04372349	0.659844843	-4.644301502	3.41E-06	0.000381243
76	C31B8.12	18.04341181	-2.809927421	0.772760191	-3.58903548	0.000331904	0.01070907
77	C31H1.5	1910.752305	-2.008546634	0.479789917	-4.187040999	2.83E-05	0.001794951
78	C33F10.11	3645.90154	-1.814589265	0.528753387	-3.433018623	0.000596901	0.015587977
79	C33G8.13	48.88572468	-2.076592815	0.696900456	-2.973879173	0.002940608	0.043029117
80	C33H5.1	535.2223332	-7.116382602	0.614169554	-9.999949781	1.52E-23	1.38E-19
81	C33H5.2	339.448545	-4.391646142	0.656758438	-6.684237408	2.32E-11	1.50E-08
82	C34B2.9	262.0453859	-1.706825143	0.516857412	-3.302532204	0.000958161	0.021150817
83	C34C12.7	820.7513791	-1.688313384	0.448235593	-3.765926865	0.000165932	0.006459229
84	C34D4.3	3572.43641	-1.672475836	0.518710657	-3.22512494	0.001259177	0.024882493
85	C35B1.4	4714.725742	-2.979371498	0.735197728	-4.158513096	3.20E-05	0.001989265
86	C35E7.3	7.413667517	2.430428314	0.784774025	3.000725502	0.002693372	0.040525964
87	C36F7.5	194.0256165	-1.517906095	0.489441091	-3.101772308	0.001923659	0.0326643
88	C39B5.5	876.5521929	-2.289027153	0.67769713	-3.394948431	0.000686415	0.017185066
89	C39D10.7	2298.100205	-2.90213428	0.643593732	-4.530856795	5.87E-06	0.000565296
90	C40C9.3	306.3144864	-2.299881362	0.713079393	-3.254753528	0.001134908	0.023317789
91	C40H1.7	808.0669239	-1.748068976	0.501905127	-3.482798882	0.000496201	0.013911835
92	C41G11.1	622.8779577	-1.841148119	0.577272816	-3.190776682	0.001418909	0.027035446
93	C41H7.4	335.3765074	1.899683044	0.402261291	4.722013007	2.34E-06	0.000278091
94	C41H7.5	74.83297891	2.147585289	0.388543306	5.512608747	3.54E-08	1.07E-05
95	C42D4.3	2401.141429	-2.370714158	0.652848008	-3.644411556	0.000268004	0.009152125
96	C43F9.4	7.990062944	-3.051433054	0.783883469	-3.914289564	9.07E-05	0.004229979
97	C43G2.3	483.5546172	-2.338752689	0.530230851	-4.412351713	1.02E-05	0.000822621
98	C44B7.5	2344.643318	-2.103469868	0.793207743	-3.099255917	0.001940074	0.032807992
99	C44C11.6	17.69859419	-2.224065294	0.575542863	-3.789485599	0.00015096	0.006033445
100	C45B11.8	254.0258696	-1.991306877	0.475341062	-4.188610254	2.81E-05	0.001788863
101	C45B2.1	3301.236582	-2.727393248	0.722134992	-3.83817484	0.000123952	0.005291649
102	C46A5.1	302.3001102	-1.54774273	0.47183082	-3.279738652	0.001039033	0.022074571
103	C46C2.5	595.4214582	-4.223899532	0.738096043	-6.051242136	1.44E-09	6.63E-07
104	C46F2.1	211.9862998	1.532804046	0.360659895	4.248500522	2.15E-05	0.001464454
105	C48B4.13	67.08138695	-1.807558149	0.485576194	-3.710951005	0.000206482	0.007514317
106	C48E7.7	2808.952084	-1.760746088	0.527554462	-3.338630934	0.000841923	0.019869173
107	C50E3.13	103.444153	-3.823093533	0.727709169	-5.296291814	1.18E-07	2.74E-05
108	C50F7.5	247.9488507	1.610595909	0.439097683	3.666674283	0.000245725	0.008504544
109	C52A10.2	70.83140283	-1.653038646	0.429691121	-3.839447042	0.000123312	0.005276751
110	C55C2.3	89.91241602	-1.687000997	0.495293747	-3.40487618	0.000661941	0.016711
111	C55C3.4	273.8872179	-1.708265003	0.508285928	-3.361307564	0.000775744	0.018855718
112	C55C3.8	252.995222	-1.893014117	0.548102828	-3.454141423	0.000552048	0.014847871
113	D1054.10	11592.0782	-3.377686064	0.738612432	-4.747847189	2.06E-06	0.000248096
114	D1086.10	52715.64284	-2.035165895	0.613471833	-3.322558219	0.000891961	0.020487003
115	D1086.11	944.2827059	-2.646250269	0.721519225	-3.721530362	0.000198019	0.007371862
116	D1086.6	322.2960261	-3.188366888	0.725339548	-4.49127017	7.08E-06	0.000634428
117	D1086.7	4411.094896	-3.28630437	0.740536858	-4.602610579	4.17E-06	0.000441268
118	D2096.13	35.62912059	-3.524242714	0.772578522	-4.512000693	6.42E-06	0.000587085
119	DH11.2	2037.079648	1.503412123	0.469699517	3.201065956	0.001369202	0.026393954
120	E02H4.4	54.15589517	-2.460742664	0.486371695	-5.02684956	4.99E-07	8.43E-05
121	E03H4.11	5.00662329	-2.316901635	0.793391151	-3.091923197	0.001988643	0.033330024
122	E04F6.10	65.83628252	-1.668924515	0.551451657	-3.021167108	0.002518023	0.038626054
123	F01D5.2	84.34295673	-1.551692176	0.480001769	-3.226885043	0.001251457	0.024756971
124	F01F1.14	33.41767281	-2.253612158	0.616043521	-3.621678865	0.000292697	0.009775119
125	F02E8.4	66.00754278	-1.516938288	0.760266519	-3.064211703	0.002182444	0.035334902
126	F02E9.3	1054.39666	-1.652423012	0.450638953	-3.667020833	0.000245393	0.008504544
127	F02H6.6	16.51862111	-2.657245478	0.793530749	-3.877788923	0.00010541	0.004711181
128	F07E5.9	11.01888407	3.591768898	0.771686826	4.558392608	5.15E-06	0.000510429
129	F07G11.1	40.37793399	-3.342888643	0.669310759	-4.861544471	1.16E-06	0.000159719
130	F07G11.4	55.66238157	-1.738480115	0.425011662	-4.076588982	4.57E-05	0.002617838
131	F07G6.10	2526.87035	-3.483041079	0.745740127	-4.897453893	9.71E-07	0.000144046
132	F08B4.8	8489.009948	-2.114631264	0.594079565	-3.563944707	0.000365323	0.011335782
133	F08F3.1	24.65105236	-2.729527185	0.670527222	-3.975673705	7.02E-05	0.003509209
134	F08H9.2	2770.541118	-2.056114227	0.588097988	-3.499971936	0.000465307	0.013390341
135	F08H9.3	133.005592	1.997520003	0.591014115	3.381279981	0.00072149	0.017792491
136	F09E10.10	13.17608347	2.247246053	0.717116565	3.084749844	0.002037234	0.033836002
137	F10C2.7	63.61563876	-2.358892952	0.439423154	-5.341469518	9.22E-08	2.42E-05
138	F11A5.15	71.93092221	2.401249468	0.521872796	4.58163943	4.61E-06	0.000473004
139	F11C1.1	127.321284	1.507623299	0.390096435	3.862090092	0.000112421	0.004918904
140	F12A10.7	136.9200767	2.508258487	0.653751397	3.844930187	0.000120587	0.005197002
141	F12A10.9	186.6396433	2.705609081	0.553816212	4.878916426	1.07E-06	0.000153241
142	F13B6.3	220.5741212	-4.179712604	0.518579845	-7.973305499	1.54E-15	2.80E-12
143	F13E9.5	242.6521463	-1.666253592	0.464293309	-3.588474686	0.000332618	0.010713031
144	F13H8.1	234.3085063	2.45524606	0.463530994	5.290507459	1.22E-07	2.79E-05
145	F14D7.10	167.6838267	1.605526211	0.485383064	3.307800679	0.000940317	0.020909926
146	F14F9.2	107.0087043	2.446116725	0.745225275	3.325037979	0.000884065	0.020359363
147	F14H3.6	113.3102466	-2.366330531	0.762995673	-3.17891616	0.001478268	0.027757403
148	F15D4.5	786.7325529	3.003866005	0.368228143	8.152483821	3.57E-16	8.07E-13
149	F15E6.3	2195.084908	2.033111998	0.573024369	3.550946854	0.000383848	0.011756398
150	F15G9.2	9.19741286	-2.451807159	0.739241519	-3.13095025	0.001742417	0.031068248
151	F15H10.5	59.94165226	-2.524736648	0.770509765	-3.365084748	0.000765202	0.018668948
152	F16A11.8	28.07318438	1.674349051	0.542347083	3.077372729	0.00208834	0.034333371
153	F16B12.7	7.503575547	-2.59686992	0.746990651	-3.19843201	0.001381771	0.026551421
154	F16B4.7	42.82274827	2.130231734	0.483687982	4.386029644	1.15E-05	0.000896803
155	F16H6.9	125.1510862	-1.761491894	0.488019156	-3.60883351	0.000307577	0.010073325
156	F17B5.1	3112.58936	1.784897141	0.375066801	4.75874938	1.95E-06	0.000238244
157	F17B5.4	15.372146	-2.405196963	0.780427027	-3.072783105	0.002120726	0.034645537
158	F17E9.4	3423.731993	-1.937740414	0.785698266	-3.308249921	0.00093881	0.020902088
159	F19B10.14	6.278711305	-2.720622023	0.770929961	-3.238855304	0.001200104	0.024174983
160	F19H6.4	33.4458079	-2.631557947	0.778055312	-3.466525279	0.000527232	0.014451119
161	F20D6.6	329.8987076	-1.626431786	0.511428093	-3.180647755	0.001469462	0.0277359
162	F21A3.3	449.5543608	-1.946289692	0.553884866	-3.514500103	0.000440583	0.012842164
163	F21C3.6	62.467179	-1.766682078	0.535250066	-3.298280207	0.00097279	0.021302531
164	F21F8.5	66.56438127	-1.693642081	0.46020411	-3.67143243	0.000241195	0.008461086
165	F21H7.12	19.09086995	2.641638574	0.752567057	3.495641135	0.000472924	0.013523542
166	F21H7.5	4010.584799	-1.784285175	0.551738652	-3.235481072	0.001214379	0.024315797
167	F22B5.6	881.4209057	-2.172569716	0.683130662	-3.195693591	0.001394952	0.026693082
168	F22E5.17	112.6739551	-2.555718257	0.747923329	-3.483034001	0.000495765	0.013911835
169	F22F7.3	92.90833296	-2.462227484	0.738222077	-3.372761931	0.000744183	0.018203311
170	F22F7.4	211.2682995	-4.066429685	0.645401159	-6.275408696	3.49E-10	1.86E-07
171	F22G12.3	18.61169144	-3.039928459	0.752196495	-3.839709288	0.00012318	0.005276751
172	F23F1.2	732.3587721	-2.771078166	0.699498805	-4.001257491	6.30E-05	0.003276526
173	F23F1.6	221.0428576	-2.217712198	0.675836574	-3.2913616	0.000997037	0.021587751
174	F25E5.7	184.1215804	2.331795167	0.394299388	5.906591748	3.49E-09	1.44E-06
175	F25H5.2	389.6072356	-1.513876897	0.485659807	-3.117626323	0.001823138	0.031823163
176	F26B1.8	6500.621705	-1.682632201	0.549492842	-3.063419208	0.002188233	0.035356775
177	F26D2.15	9.450118876	-2.309497061	0.731991352	-3.051629017	0.002276032	0.036170726
178	F26E4.5	217.5319679	-1.66420241	0.524226469	-3.175050271	0.001498105	0.028025456
179	F26F12.3	13029.03577	1.992038296	0.46645268	4.271311029	1.94E-05	0.001352891
180	F26G1.3	37.49718973	-2.795226484	0.680445867	-4.04083098	5.33E-05	0.002921509
181	F26G1.5	1117.020934	-2.110332577	0.581296828	-3.633675159	0.000279413	0.00943591
182	F27C1.1	6805.97699	-1.969139916	0.533381568	-3.693423536	0.000221255	0.007885753
183	F27E5.7	586.2917665	-1.590702765	0.485427	-3.276574213	0.001050747	0.022162851
184	F28H1.4	566.3487709	-2.617464299	0.696173413	-3.793021474	0.000148825	0.005999747
185	F29B9.8	579.8257175	-1.731210139	0.567752285	-3.050529246	0.002284384	0.036176413
186	F29D10.2	148.7681256	-3.213424205	0.651402336	-4.93719456	7.93E-07	0.000122845
187	F30A10.13	576.2844665	-3.00703755	0.758662412	-4.146017576	3.38E-05	0.002070305
188	F30A10.14	286.0510787	-3.034751416	0.771166119	-4.211507449	2.54E-05	0.001657661
189	F31F7.1	2828.177013	1.739307213	0.361232553	4.814905994	1.47E-06	0.000193168
190	F34D10.4	1466.160241	1.52626044	0.342754837	4.452931814	8.47E-06	0.000719839
191	F34D6.9	6.947667248	2.773786886	0.761592433	3.334924465	0.000853226	0.019953797
192	F35B3.4	3239.805689	-2.727688607	0.703025097	-3.923743772	8.72E-05	0.004131172
193	F35G2.12	29.01680259	-2.469304656	0.544774249	-4.475898608	7.61E-06	0.00066537
194	F35H10.2	331.2732921	-1.683063059	0.344704021	-4.881220186	1.05E-06	0.000152673
195	F35H8.4	218.947752	-1.787908075	0.525057957	-3.405814224	0.000659671	0.01668205
196	F36A2.10	1612.749882	-1.738507697	0.531357709	-3.272894025	0.001064524	0.022342293
197	F36A4.5	58.57621161	-2.543520137	0.779226557	-3.431897946	0.000599373	0.015587977
198	F36D1.8	286.3405052	-2.846108065	0.74874658	-3.910675232	9.20E-05	0.004271764
199	F36F12.1	210.7766789	-4.010468837	0.704219591	-5.740282755	9.45E-09	3.58E-06
200	F36F12.2	125.2008906	-1.844171672	0.779632944	-3.373004634	0.000743527	0.018203311
201	F36F12.3	28.44881079	-3.996764039	0.766762504	-5.133462298	2.84E-07	5.31E-05
202	F36H1.11	42.33145851	-2.296925283	0.698887095	-3.285866598	0.001016691	0.021830525
203	F36H12.5	655.6699694	-1.544403504	0.451644414	-3.419525436	0.000627305	0.016129037
204	F36H9.2	224.5399787	-3.152866874	0.65762118	-4.810922663	1.50E-06	0.000194273
205	F38B2.6	1977.514434	-2.071257842	0.700707065	-2.974206697	0.002937471	0.043018744
206	F38G1.3	51.29228423	-1.61650903	0.413780154	-3.89724235	9.73E-05	0.004436078
207	F39D8.3	314.3942282	-1.715012343	0.5843098	-2.936707967	0.003317163	0.046696202
208	F39E9.20	22.93015002	1.634998982	0.527994953	3.082279711	0.002054217	0.034001072
209	F39E9.6	7.852564076	2.26304646	0.779935139	2.927736799	0.003414389	0.047504892
210	F41D3.9	18.7279176	-2.231275143	0.710223629	-3.101002471	0.001928667	0.032695599
211	F41E6.1	141.0765997	-1.736943832	0.556856013	-3.120466992	0.001805645	0.031600569
212	F41E7.16	5.152702617	2.309138386	0.790302339	2.911488762	0.003597108	0.049326712
213	F41E7.20	194.2077828	-1.712958905	0.545025442	-3.140305083	0.00168772	0.030312108
214	F41G3.5	348.343584	-1.514832512	0.427472889	-3.543646158	0.000394635	0.011925341
215	F41H10.1	5729.70236	-1.9191188	0.474762093	-4.042949611	5.28E-05	0.002921509
216	F42A9.7	779.6777562	-1.622082825	0.536144544	-3.026447575	0.002474457	0.038086863
217	F42C5.5	280.6841987	-1.659119397	0.512393107	-3.238380208	0.001202105	0.024174983
218	F42G2.7	18.54688474	2.115403535	0.594674276	3.53523288	0.000407416	0.012169366
219	F43C11.8	24.81819127	2.095403395	0.677667791	3.070800358	0.002134858	0.034779928
220	F44F1.3	198.1765539	-1.949233453	0.512217716	-3.804062346	0.000142342	0.005829273
221	F44F1.4	216.5517963	2.186724097	0.411044612	5.313361717	1.08E-07	2.67E-05
222	F45D3.11	16.48480032	2.270815155	0.644196886	3.489371046	0.000484159	0.013719835
223	F45E10.2	857.3437096	-1.770051602	0.366320345	-4.83127491	1.36E-06	0.00018056
224	F45H7.14	10.30852911	2.309874527	0.730951649	3.074781558	0.002106568	0.034513006
225	F46A8.13	2420.834156	4.046448851	0.282674408	14.30613413	2.00E-46	3.63E-42
226	F46A8.7	262.2208018	3.82903853	0.383462353	9.931717436	3.03E-23	1.83E-19
227	F46A8.8	10.05674456	2.353500497	0.762694396	2.989912848	0.002790571	0.04153957
228	F46C5.4	77.12501672	-1.517353882	0.454377878	-3.333289071	0.000858257	0.01997062
229	F47B3.7	284.0155362	-1.972172798	0.481126052	-4.098734445	4.15E-05	0.002457331
230	F47B8.10	88.77600635	2.02966971	0.578868422	3.506736772	0.000453638	0.013109547
231	F47B8.4	185.1518567	-2.183284432	0.476227265	-4.577156205	4.71E-06	0.00047931
232	F47D12.3	43.67652553	-1.701648864	0.545054489	-3.109030518	0.001877023	0.032419846
233	F47E1.4	126.6826269	-2.569445863	0.765905601	-3.48264061	0.000496494	0.013911835
234	F48B9.3	837.745281	-1.710938929	0.485440394	-3.524770607	0.00042385	0.012514188
235	F48C1.9	107.3673532	3.470391227	0.720921478	4.868918605	1.12E-06	0.000157451
236	F48E3.4	1071.048511	-2.990941966	0.686054439	-4.402869734	1.07E-05	0.000854378
237	F48G7.5	875.2831708	-2.936387017	0.51267456	-5.726180627	1.03E-08	3.79E-06
238	F48G7.8	529.2148921	-3.116526565	0.463732802	-6.710534776	1.94E-11	1.35E-08
239	F49B2.9	10.15938185	-2.623786912	0.76726367	-3.249193088	0.001157329	0.023564466
240	F49C12.1	124.0900575	-6.110967759	0.695134068	-7.342574047	2.10E-13	1.81E-10
241	F49C12.2	723.3835217	-4.026335457	0.706884524	-5.829063961	5.57E-09	2.24E-06
242	F49C12.3	195.3797227	-5.303669	0.661189685	-7.576154568	3.56E-14	3.79E-11
243	F49C12.4	460.4408347	-5.095382484	0.654167825	-7.752271446	9.03E-15	1.09E-11
244	F49C12.5	165.9557995	-5.110506035	0.576301725	-8.464128269	2.58E-17	9.34E-14
245	F49D11.3	87.31060362	-2.647502325	0.693255825	-3.826258347	0.000130106	0.00550244
246	F49D11.7	208.6745339	-1.750514022	0.597484601	-2.932793058	0.003359277	0.04699094
247	F49E12.10	870.5308321	-2.151677883	0.532995501	-4.037933008	5.39E-05	0.002948891
248	F49H6.5	37.46305693	3.049361261	0.718642656	4.190509901	2.78E-05	0.001785246
249	F52D2.12	166.1588589	1.64405348	0.498843912	3.295251029	0.000983338	0.021367828
250	F52F12.8	368.2265305	-1.76752571	0.55341487	-3.195176217	0.001397455	0.02670935
251	F52H3.6	3523.185132	-1.619206524	0.448150072	-3.613363927	0.00030225	0.010001878
252	F53B6.7	1547.033998	-1.699348631	0.461710822	-3.68085171	0.000232456	0.008218143
253	F53F8.3	20.1001998	-2.806920233	0.793164928	-4.085046097	4.41E-05	0.002564875
254	F53G12.8	164.7000691	-1.682113302	0.568268741	-2.961593125	0.003060519	0.044100329
255	F53H2.1	75.89220878	2.83898684	0.445080614	6.331449358	2.43E-10	1.33E-07
256	F53H4.2	921.2768085	-2.58979456	0.742983654	-3.563651828	0.000365731	0.011335782
257	F53H4.3	103.852702	-1.725713946	0.521754924	-3.305197659	0.000949094	0.02105338
258	F54D1.1	848.1257559	-1.710629243	0.3778536	-4.526963323	5.98E-06	0.000570061
259	F54D10.7	12.11139969	-2.960897019	0.779626162	-3.599701697	0.000318582	0.01031603
260	F54D5.5	42.40910718	-2.161734181	0.623719881	-3.442356036	0.000576671	0.015260697
261	F54F7.3	3469.794991	-2.468765552	0.792914185	-3.645779831	0.000266582	0.009139022
262	F54F7.6	9.829301708	-2.397444653	0.79297657	-3.431080921	0.000601181	0.015590231
263	F54F7.9	29.97043472	-2.443200662	0.762860262	-3.233883011	0.001221195	0.024344543
264	F54H5.3	259.4636992	-2.33903956	0.612490034	-3.823912646	0.00013135	0.005542132
265	F55B11.2	7438.533051	-2.20293012	0.793503601	-3.247414605	0.001164586	0.023617933
266	F55G11.4	2253.552748	-1.59200726	0.360383733	-4.417375394	9.99E-06	0.000810946
267	F55H12.5	639.6867895	-1.85003724	0.517513154	-3.575558941	0.00034948	0.011059345
268	F55H2.8	43.65720814	1.954487847	0.592229842	3.289976473	0.001001958	0.021651398
269	F56C3.8	47.13904594	-2.697135425	0.654257769	-4.099870557	4.13E-05	0.002453316
270	F56D6.12	90.59781723	-1.98075505	0.648771221	-3.054719544	0.002252711	0.035906287
271	F56D6.13	408.4157203	-1.760735173	0.580612224	-3.034632616	0.002408289	0.037482743
272	F56D6.20	286.3550071	-2.513955699	0.52599332	-4.777864484	1.77E-06	0.00021965
273	F56D6.8	91.17421798	2.769658434	0.712717393	3.922083053	8.78E-05	0.004134191
274	F56D6.9	73.01091294	2.76205162	0.679517301	4.087810059	4.35E-05	0.002542691
275	F56H1.10	40.47279565	-1.758199929	0.473791652	-3.699655825	0.000215892	0.007753694
276	F56H6.2	39.52238373	1.912577852	0.580188221	3.283188915	0.001026399	0.021960805
277	F57B1.9	288.7761364	-2.279751779	0.412968389	-5.514408511	3.50E-08	1.07E-05
278	F57B9.3	180.4586462	-2.290740183	0.458247214	-4.990313008	6.03E-07	9.83E-05
279	F57C2.4	885.1448079	-1.753252201	0.777622028	-3.168665016	0.001531408	0.028430784
280	F57E7.4	45.30598607	2.349939759	0.523247186	4.46381019	8.05E-06	0.000694
281	F58A4.1	38.98776899	-3.327528785	0.619214138	-5.212194448	1.87E-07	3.93E-05
282	F58A6.9	4161.447226	-1.682114162	0.547585894	-3.073117386	0.002118351	0.034645537
283	F58B4.7	140.6913406	-1.657223042	0.378432597	-4.375567328	1.21E-05	0.000928958
284	F58E6.4	106.2886169	-3.449378654	0.713450762	-4.84783006	1.25E-06	0.000169337
285	F58F12.12	266.6394677	1.78255287	0.569440021	3.130709602	0.001743845	0.031068248
286	F58F9.9	11.6502529	2.106955087	0.790884969	3.062280142	0.002196578	0.035364762
287	F59A1.13	34.29450194	-3.179367091	0.685390436	-4.519028731	6.21E-06	0.000577454
288	F59C6.18	5488.185763	3.04012367	0.490076336	6.206118279	5.43E-10	2.66E-07
289	F59H6.15	250.9231111	-1.593438882	0.498780783	-3.19488961	0.001398843	0.02670935
290	H05L14.1	1372.019739	-1.813248206	0.477754526	-3.795850949	0.000147138	0.005971621
291	H06A10.1	573.5523476	-2.010370156	0.573254476	-3.507761584	0.000451894	0.013105346
292	H08M01.1	326.9280177	-1.943598997	0.481866721	-4.033166106	5.50E-05	0.002991304
293	H10E21.4	2094.139043	-1.91822697	0.647907376	-2.967216948	0.003005088	0.043550924
294	H12D21.5	132.247369	-1.715365015	0.434985793	-3.940514711	8.13E-05	0.003927728
295	H29C22.1	309.8445229	-3.324336326	0.763286158	-4.639821661	3.49E-06	0.000384878
296	H34I24.1	712.674083	-1.554255025	0.470826582	-3.301350795	0.000962205	0.021188409
297	H41C03.3	483.1046975	-1.815150393	0.615931582	-2.9497212	0.003180608	0.045225597
298	K01A2.4	125.890641	2.63730344	0.468830609	5.610986117	2.01E-08	6.87E-06
299	K01A6.5	45.20433363	-1.790428865	0.539807797	-3.311995362	0.000926331	0.02082921
300	K01D12.1	182.0233625	-2.629954128	0.582419209	-4.515287433	6.32E-06	0.000580986
301	K01D12.5	271.4299406	-1.967201415	0.61294733	-3.211357988	0.001321092	0.025630327
302	K01D12.9	2087.630597	-2.264866616	0.666137092	-3.413991009	0.000640187	0.016367264
303	K01H12.4	465.093377	-1.738662578	0.499444761	-3.481626979	0.000498377	0.013943014
304	K02B12.6	71.71061674	-2.309053099	0.574908989	-4.003978586	6.23E-05	0.003249104
305	K02C4.2	240.0612577	1.533890598	0.4710412	3.255394592	0.001132349	0.023317789
306	K02E2.7	17.14283802	2.538070332	0.609254172	4.079545587	4.51E-05	0.00260123
307	K02E2.8	260.0171392	-2.306557856	0.691979205	-3.353984322	0.000796569	0.019173791
308	K02F6.3	855.9369865	-1.538404775	0.495748483	-3.103733711	0.001910952	0.032647733
309	K02G10.15	17.37185504	-1.881300682	0.618046675	-3.002724496	0.002675745	0.040404145
310	K04C2.5	190.4896106	-2.274879804	0.633894452	-3.590404767	0.000330165	0.010671989
311	K05F6.10	8.586970849	2.247446711	0.790590345	3.359048915	0.000782112	0.018926488
312	K06A4.15	10.33366372	2.320177821	0.791302634	2.936210133	0.003322492	0.046696202
313	K07A1.5	380.2853117	-1.52765171	0.459405297	-3.325492075	0.000882626	0.020352121
314	K07H8.7	43.57742105	-1.570568067	0.472599323	-3.317661629	0.000907744	0.020548033
315	K08D9.6	65.58809043	-1.581273824	0.364761178	-4.327078109	1.51E-05	0.001116354
316	K08D9.9	43.16063706	-2.751239042	0.791383429	-3.807299502	0.000140493	0.005792838
317	K08E7.4	35.71975587	-1.61753993	0.50957308	-3.163945424	0.00155646	0.028660711
318	K09C4.1	231.9313066	-3.027729886	0.385815545	-7.825049177	5.07E-15	7.07E-12
319	K09C4.5	1532.644284	-2.856796803	0.429850668	-6.644996678	3.03E-11	1.89E-08
320	K09C8.9	439.9209133	-2.027554934	0.573188864	-3.539388651	0.000401055	0.012058775
321	K09D9.1	4994.429851	1.92107702	0.586863087	3.276458771	0.001051177	0.022162851
322	K09H9.9	77.12523783	-1.530373732	0.392783381	-3.890233641	0.000100148	0.004509389
323	K10C2.14	86.52137064	-3.003318328	0.79204503	-4.46442188	8.03E-06	0.000694
324	K10C2.7	45.14001436	-2.3250773	0.773168499	-3.077383892	0.002088262	0.034333371
325	K10C2.8	756.5619075	-3.870895993	0.75804337	-5.551362874	2.83E-08	9.22E-06
326	K10D11.3	220.6481062	-1.99227535	0.479142025	-4.154758386	3.26E-05	0.002011691
327	K10G4.5	165.913487	4.39236681	0.476485566	9.077262377	1.11E-19	5.04E-16
328	K10H10.4	412.8361088	-2.93284357	0.63839525	-4.605307818	4.12E-06	0.00043853
329	K11D12.13	1046.613189	-3.057986886	0.689243349	-4.48488654	7.30E-06	0.000644155
330	K12D9.1	6.892651695	-2.882721148	0.787191042	-3.715495521	0.000202806	0.007461359
331	K12H4.6	19.10975701	-3.014984253	0.714383978	-4.02158071	5.78E-05	0.003095854
332	M01B2.8	51.39159114	-2.437544748	0.644353383	-3.75568657	0.000172867	0.006643448
333	M02D8.6	667.4176607	-1.952442011	0.511315521	-3.818073535	0.000134498	0.005622507
334	M02G9.4	55.23167301	-2.122084972	0.467144066	-4.52464431	6.05E-06	0.000573329
335	M03F4.12	36.77491266	-1.988993855	0.635310611	-3.121636449	0.001798489	0.031545006
336	M151.7	11.83495617	-2.402732154	0.775682167	-3.046237171	0.00231725	0.036568908
337	M162.7	512.202852	-2.265494528	0.427141396	-5.302655116	1.14E-07	2.74E-05
338	M199.9	8.718775141	-2.570373691	0.7810373	-3.275973783	0.001052983	0.022162851
339	M28.8	276.6923611	-1.780496868	0.497098366	-3.580029995	0.000343555	0.010909973
340	M28.9	1401.615013	-1.688540492	0.43713117	-3.862961423	0.000112021	0.004918904
341	R03G8.6	1558.192479	-3.165190261	0.73036254	-4.449603409	8.60E-06	0.000725295
342	R05D8.9	51.65195487	-2.006005747	0.551200182	-3.630568746	0.000282797	0.00953243
343	R05G9.3	14.90141685	-2.602448671	0.793528173	-3.786071403	0.000153048	0.006088608
344	R05G9R.1	142.2047278	-2.208591891	0.681299134	-3.252403905	0.001144333	0.023458175
345	R05H10.7	12.94963297	2.687829161	0.715288733	3.669514944	0.000243011	0.008462468
346	R06A10.4	88.90617959	-1.999592693	0.399197277	-4.998169096	5.79E-07	9.54E-05
347	R06A10.5	36.30970576	-1.919805158	0.474756673	-4.019753934	5.83E-05	0.003101604
348	R07E5.4	609.6032723	-2.05690516	0.578058944	-3.560423102	0.000370258	0.01143692
349	R08A2.1	509.3390965	-1.592567596	0.51686805	-3.081897386	0.002056857	0.034001072
350	R08F11.4	1777.053803	1.803166708	0.47824833	3.770675743	0.000162806	0.006378687
351	R09E10.6	15339.29442	-1.644366972	0.517315918	-3.179433785	0.001475631	0.027757403
352	R09F10.8	97.36620661	-2.990602414	0.752480395	-4.071120574	4.68E-05	0.002663211
353	R09H10.6	496.9252831	-2.290051414	0.64288851	-3.57210764	0.00035412	0.011103641
354	R105.1	2376.488355	-1.800850783	0.485191334	-3.712180742	0.000205481	0.007506096
355	R12E2.14	7113.911556	-2.153820617	0.696599966	-3.111194176	0.001863324	0.032275619
356	R12E2.15	4384.538449	-2.190174682	0.668594021	-3.289147564	0.001004913	0.021680494
357	R12E2.6	286.8675442	-2.140172397	0.739960719	-2.93124298	0.003376086	0.047153189
358	R12E2.7	8243.555274	-2.39064303	0.698120468	-3.451701141	0.000557064	0.014932015
359	R17.3	87.73635558	-2.265257298	0.744414703	-3.079102016	0.002076256	0.03419682
360	T01C3.3	215.7171244	-2.543602903	0.626163986	-4.067789768	4.75E-05	0.002693087
361	T01E8.8	1642.122203	-1.583686995	0.442199475	-3.581449244	0.000341694	0.010889075
362	T04B2.7	227.3999976	-1.822516359	0.584052315	-3.121246776	0.001800871	0.031556203
363	T04C12.32	56.69598975	2.593959219	0.686300917	3.77647481	0.000159064	0.006272791
364	T04G9.7	1522.336195	-2.996301876	0.74321698	-4.158890772	3.20E-05	0.001989265
365	T05A10.8	6.492537313	2.303714345	0.792133858	3.272057017	0.00106768	0.022342293
366	T06C12.12	10.73258277	2.516253162	0.743335277	3.280216565	0.001037274	0.022063105
367	T06E4.8	397.2713565	-2.027077552	0.633190482	-3.206988892	0.001341322	0.025967128
368	T06E4.9	1456.258599	-2.344559702	0.659018416	-3.57132915	0.000355174	0.011103641
369	T07A5.1	1488.598977	-1.873930927	0.444241186	-4.21811102	2.46E-05	0.001625597
370	T08B2.12	3041.73143	-1.640050883	0.533560492	-3.074735508	0.002106893	0.034513006
371	T08B6.9	2619.513244	-1.915218668	0.388529428	-4.929386671	8.25E-07	0.000126535
372	T08D10.3	12.26436986	-2.174284738	0.732175771	-2.908500451	0.003631667	0.049687676
373	T10B11.4	62.00894934	-1.953072753	0.660623102	-2.961939334	0.00305708	0.044092595
374	T10C6.15	1372.98297	1.947343274	0.595500097	3.273422977	0.001062533	0.022337884
375	T10C6.7	101.8307133	-2.605248693	0.702606132	-3.719203526	0.000199852	0.007382695
376	T10E9.3	10419.21943	-2.35377782	0.659163378	-3.585421711	0.000336534	0.010797677
377	T11F8.1	257.4686113	-1.634127904	0.474658783	-3.442422112	0.00057653	0.015260697
378	T11G6.11	61.79476245	-2.507563247	0.450141466	-5.530615816	3.19E-08	1.00E-05
379	T12B5.14	1220.450446	-3.37938465	0.726648136	-4.783662885	1.72E-06	0.000214877
380	T12B5.15	334.4430872	-1.880173925	0.783987189	-3.212672469	0.001315062	0.02558899
381	T12D8.5	637.1290949	1.778488763	0.480123684	3.703917635	0.000212295	0.007654892
382	T13B5.9	21.78539493	-2.354669233	0.776710773	-3.045740741	0.002321079	0.036597428
383	T14E8.4	102.004668	-1.558559396	0.510052235	-3.051252647	0.002278887	0.036176413
384	T15H9.5	38.04984877	-2.553473712	0.672029772	-3.784846141	0.000153804	0.006105265
385	T16A9.6	119.3644403	-1.738540489	0.521146397	-3.335570717	0.000851245	0.019933229
386	T16G1.3	6.777266039	-2.467518372	0.768335605	-2.96648261	0.003012274	0.04357591
387	T19B4.5	50.04974496	-1.66831274	0.562450801	-2.958772941	0.003088666	0.044336194
388	T19C9.8	6156.794235	-2.282141537	0.400590185	-5.697044964	1.22E-08	4.41E-06
389	T20B5.2	263.9581858	-1.606732727	0.500047613	-3.212453788	0.001316063	0.02558899
390	T21B4.21	10.99378049	-1.815683795	0.776691956	-3.043153764	0.002341127	0.036785361
391	T21C9.13	1890.072016	-2.038228825	0.587470344	-3.472867362	0.00051493	0.014165264
392	T22A3.6	175.9311949	-1.722095436	0.413372536	-4.163887314	3.13E-05	0.00197329
393	T22B11.1	124.8462125	-1.625531774	0.484805396	-3.351727399	0.000803091	0.019279498
394	T22F3.12	52.56438898	1.595413966	0.390127782	4.080810429	4.49E-05	0.00259538
395	T25B2.2	913.3649648	-2.718126913	0.717707791	-3.841902068	0.000122085	0.005249056
396	T25D3.3	69.40542607	-1.844755243	0.569123648	-3.23815275	0.001203064	0.024174983
397	T25E4.1	476.6889437	-1.976480461	0.602984718	-3.280484774	0.001036289	0.022063105
398	T25F10.3	577.804449	-2.182909593	0.550587574	-3.96611021	7.31E-05	0.003622932
399	T26H5.8	106.9886344	2.385675376	0.559525094	4.255360763	2.09E-05	0.001430634
400	T27D12.6	31.33290375	-2.090328405	0.601796571	-3.448449033	0.000563816	0.015052553
401	T28A11.20	11.71980676	2.320689071	0.713621145	3.188254178	0.001431347	0.027243748
402	T28B11.11	52.40105414	2.570622758	0.496054392	5.149010856	2.62E-07	5.05E-05
403	T28B11.5	24.80168926	1.78883866	0.58910379	3.021979026	0.002511279	0.038555276
404	T28B11.7	28.13673215	1.799602933	0.553996669	3.23422536	0.001219732	0.024342187
405	T28B8.4	521.8076656	-1.993174705	0.543350806	-3.670061623	0.000242492	0.008462468
406	W01A8.6	1606.456338	-1.731158967	0.478563672	-3.617773515	0.000297148	0.009869138
407	W02D7.11	16.02147497	3.67828427	0.690686773	4.70259999	2.57E-06	0.000299974
408	W02D7.12	6.523445039	2.035484447	0.786151666	3.06322481	0.002189655	0.035356775
409	W02D9.7	5224.474763	-1.531796023	0.761990297	-3.120263372	0.001806894	0.031600569
410	W03D8.5	173.852849	-1.845217699	0.618680215	-2.985944317	0.002827041	0.041875836
411	W03F8.6	1701.235749	-2.284845522	0.583203905	-3.921683763	8.79E-05	0.004134191
412	W03F9.4	246.7468239	2.590345022	0.630777293	4.114628359	3.88E-05	0.00230909
413	W03G11.2	514.4840366	-2.730564906	0.756916932	-3.733206643	0.000189057	0.007129432
414	W05F2.3	359.5986111	-1.98252804	0.641049323	-3.0989477	0.001942093	0.032807992
415	W06A7.4	636.5982366	-1.686408091	0.487139983	-3.461364716	0.000537444	0.01454152
416	W06D11.1	8.051101859	-2.322949292	0.792589258	-3.285395796	0.001018392	0.021841131
417	W07G4.7	5.527506157	-2.707380652	0.789985306	-3.48756925	0.000487433	0.01376446
418	W09C3.8	122.6088754	-1.825052566	0.440708724	-4.138617644	3.49E-05	0.00212234
419	W10G11.1	23.76308069	2.679144634	0.685043241	3.853403052	0.000116487	0.005068602
420	Y116A8C.23	1181.294638	-1.65423802	0.444794633	-3.719281135	0.000199791	0.007382695
421	Y116A8C.33	350.0234462	-2.116406249	0.566233282	-3.73921548	0.000184595	0.007019668
422	Y17D7C.2	57.23542364	2.253734638	0.682415478	3.297801871	0.000974449	0.021302531
423	Y18H1A.1	118.2302896	-2.06608218	0.52526811	-3.930118063	8.49E-05	0.004044343
424	Y20F4.4	348.0786314	1.533402018	0.294705501	5.201840659	1.97E-07	4.11E-05
425	Y22D7AR.10	258.4068117	-3.712507669	0.700680513	-5.375178314	7.65E-08	2.10E-05
426	Y26D4A.3	22.78889864	-3.62098458	0.646890466	-5.096878751	3.45E-07	6.31E-05
427	Y34F4.6	266.4221289	-2.673185608	0.344239801	-7.752880106	8.98E-15	1.09E-11
428	Y37A1A.3	384.126219	-1.737625763	0.53278327	-3.261865283	0.001106817	0.022896571
429	Y37D8A.19	2795.139464	-1.665227315	0.772009364	-3.153662314	0.001612355	0.029331904
430	Y37D8A.21	485.7247446	-1.838164272	0.557231763	-3.299664133	0.000968006	0.021278309
431	Y37F4.15	119.2357792	1.693884559	0.410146459	4.126495474	3.68E-05	0.002207682
432	Y37H2A.11	10.05853414	-3.083486897	0.765685659	-3.665923554	0.000246448	0.008513258
433	Y37H2A.13	30.55093274	-2.905963751	0.792995794	-4.379671982	1.19E-05	0.000916707
434	Y37H2A.14	950.9535069	-2.387397951	0.333906649	-7.14776459	8.82E-13	7.26E-10
435	Y38E10A.28	177.2789768	-1.515751352	0.364178491	-4.158896477	3.20E-05	0.001989265
436	Y38F2AR.10	191.2301312	-1.863893416	0.488630901	-3.813949327	0.000136764	0.00566961
437	Y38H6C.19	6.856049124	2.64010673	0.784288481	3.284072992	0.001023184	0.021917937
438	Y38H6C.21	24.20508815	2.319385557	0.718908074	3.227353733	0.001249409	0.024756971
439	Y38H8A.2	83.22856395	-1.756900579	0.586297105	-2.998863966	0.002709883	0.040672957
440	Y39B6A.10	16.21898368	-2.320764352	0.761577974	-3.035423512	0.002401981	0.037448979
441	Y41C4A.32	3951.694185	-2.472148797	0.369640037	-6.687880457	2.26E-11	1.50E-08
442	Y41D4B.17	632.2681256	1.79273211	0.389067187	4.606886963	4.09E-06	0.000437789
443	Y43C5A.7	320.843033	-2.000879194	0.60488168	-3.309066895	0.000936075	0.020866857
444	Y43F8B.9	148.6836794	1.551438583	0.471966332	3.286934957	0.001012842	0.021799593
445	Y45F10C.4	3193.195997	-3.481230279	0.755957435	-4.902917158	9.44E-07	0.000141253
446	Y45F10D.14	162.1201814	-2.499654882	0.731414742	-3.460908656	0.000538355	0.014544436
447	Y46H3A.5	242.1736592	2.772893866	0.591050165	4.695113289	2.66E-06	0.000307209
448	Y47D3B.12	67.82003647	-3.307535838	0.678163797	-4.831572155	1.35E-06	0.00018056
449	Y47D7A.13	3680.061921	-2.375917449	0.658847965	-3.620805164	0.000293688	0.009790128
450	Y47D7A.15	5700.102225	-2.869485662	0.734910742	-3.997844647	6.39E-05	0.003305857
451	Y47D7A.6	111.292533	-2.864689768	0.730158989	-3.985126496	6.74E-05	0.003438894
452	Y47D7A.7	20.63943277	-2.336424824	0.792905613	-3.381501445	0.000720909	0.017792491
453	Y47H9C.1	3439.01772	-2.019332859	0.444814605	-4.539897114	5.63E-06	0.000547718
454	Y48G1C.13	92.95076861	-3.297325046	0.766877914	-4.501876813	6.74E-06	0.000609606
455	Y48G8AL.12	1897.622647	-2.099044483	0.707260983	-2.988967442	0.00279922	0.041599896
456	Y48G8AL.16	483.7943651	-1.955743252	0.629306273	-3.113201372	0.001850697	0.032180082
457	Y49F6B.12	100.537639	2.500668592	0.485008098	5.142350831	2.71E-07	5.12E-05
458	Y49F6C.8	11.99558214	-3.097288779	0.786802478	-4.078681279	4.53E-05	0.00260263
459	Y49G5A.1	2929.318451	1.645327213	0.440118201	3.738479732	0.000185136	0.007025481
460	Y4C6A.3	805.2982309	-2.430217502	0.547760074	-4.439164623	9.03E-06	0.000749852
461	Y51A2B.4	164.0837856	-1.548915116	0.441649429	-3.506464976	0.000454101	0.013109547
462	Y51F10.2	2005.793258	-1.754814405	0.596250072	-2.945606541	0.003223221	0.045723767
463	Y51H4A.5	159.3824137	-1.79137642	0.525555764	-3.406518692	0.00065797	0.016680565
464	Y51H4A.935	71.41872631	-1.716788322	0.529603665	-3.240079996	0.001194962	0.024113714
465	Y53C10A.10	971.7031378	-1.539083053	0.526909677	-2.921704825	0.003481213	0.048212268
466	Y53F4B.45	20309.56746	2.423189234	0.287278289	8.43496699	3.31E-17	9.99E-14
467	Y54E2A.5	93.90640518	-1.763935051	0.534508785	-3.299422132	0.000968841	0.021278309
468	Y57E12B.4	282.34803	-2.16076058	0.674003871	-3.216900108	0.001295837	0.025357781
469	Y57G11C.23	251.1700075	-1.826549999	0.457697808	-3.990154719	6.60E-05	0.003395491
470	Y59C2A.1	235.1866984	-1.545878876	0.507671444	-3.044634625	0.002329631	0.036668398
471	Y59E9AL.3	1079.886207	-1.801870959	0.6102266	-2.956247719	0.003114069	0.044594745
472	Y59H11AR.4	129.6382073	-2.252874228	0.468352959	-4.79958517	1.59E-06	0.000201256
473	Y5H2B.1	32.17071073	-2.644652841	0.725972486	-3.622201185	0.000292107	0.009773429
474	Y62H9A.3	1184.585128	-3.637120805	0.736664701	-5.145261215	2.67E-07	5.09E-05
475	Y62H9A.4	1134.045676	-1.815276685	0.777123454	-3.609145152	0.000307208	0.010073325
476	Y62H9A.5	3026.305314	-1.67914631	0.773598131	-3.104465675	0.00190623	0.032613117
477	Y68A4A.13	385.7752095	1.886981307	0.359794066	5.243388016	1.58E-07	3.48E-05
478	Y69A2AR.12	17.54629676	2.067567739	0.618540124	3.32131323	0.000895949	0.020502626
479	Y69A2AR.48	6.310091367	-2.635532451	0.77325786	-3.185081217	0.001447134	0.027457621
480	Y69E1A.1	2557.16628	-1.644968673	0.511167541	-3.218767817	0.001287427	0.025247793
481	Y6E2A.4	215.1249051	2.370432562	0.606487753	3.908296344	9.29E-05	0.004292027
482	Y6G8.2	1157.682967	2.522079175	0.465786959	5.414088819	6.16E-08	1.74E-05
483	Y70D2A.1	94.17881834	-2.65064214	0.664729675	-3.979807842	6.90E-05	0.003484706
484	Y71F9AM.9	129.6781233	-3.610137985	0.601649986	-5.94837282	2.71E-09	1.17E-06
485	Y73C8C.10	482.3870673	2.679205016	0.713857243	3.801820321	0.000143637	0.005869009
486	Y79H2A.2	2288.756189	-1.889776285	0.605706948	-3.123560227	0.001786773	0.031430881
487	Y87G2A.2	386.7244736	1.853018377	0.322787231	5.739554456	9.49E-09	3.58E-06
488	Y87G2A.20	85.82122277	-2.329208174	0.513065506	-4.531626062	5.85E-06	0.000565296
489	Y95B8A.2	684.777691	-2.175711498	0.655828228	-3.32666436	0.000878922	0.020292553
490	ZC155.4	855.3355796	-1.750067232	0.403297258	-4.338928001	1.43E-05	0.001062168
491	ZC190.8	72.25253151	-1.55962645	0.386257157	-4.031847037	5.53E-05	0.002999141
492	ZC21.10	59.54445501	2.538463821	0.633699156	4.007104632	6.15E-05	0.003215681
493	ZC308.4	717.3595329	-2.66341787	0.62889374	-4.247214448	2.16E-05	0.001467366
494	ZC373.2	1303.824527	-3.162052735	0.748085439	-4.397063629	1.10E-05	0.000866889
495	ZC395.5	1782.724109	2.147983674	0.402925428	5.330803568	9.78E-08	2.53E-05
496	ZC581.3	346.8452623	-1.964248301	0.621239116	-3.164359706	0.001554246	0.028649086
497	ZK1010.12	198.4801667	-2.333148361	0.611985245	-3.815740084	0.000135775	0.005649816
498	ZK1037.6	175.035271	-2.450112425	0.60953633	-4.017984948	5.87E-05	0.003115811
499	ZK105.1	604.3484477	-1.977351226	0.460336785	-4.294772775	1.75E-05	0.001246206
500	ZK105.13	35.14953689	1.648021428	0.522385835	3.141686273	0.001679779	0.030224337
501	ZK1086.3	132.2672052	-2.162321249	0.752239362	-2.927764021	0.003414091	0.047504892
502	ZK1225.5	365.2156251	-1.679247539	0.473306131	-3.547743676	0.000388546	0.011880192
503	ZK1240.1	202.0538684	2.068674529	0.653986831	3.170274842	0.001522948	0.028331844
504	ZK1307.2	694.786744	-1.862528887	0.615826959	-3.027380173	0.002466835	0.038034224
505	ZK218.7	5.485561753	-2.758784146	0.788545578	-3.53742015	0.000404056	0.012088965
506	ZK250.14	108.8605626	-2.382108745	0.419570463	-5.663430755	1.48E-08	5.16E-06
507	ZK262.4	74.33785528	-1.759831198	0.467747184	-3.757872405	0.000171364	0.00659971
508	ZK265.3	5388.509928	-1.602994647	0.534437439	-3.00031172	0.002697034	0.040535964
509	ZK353.3	42.61316519	-2.319588251	0.656043263	-3.538905277	0.00040179	0.012058775
510	ZK354.3	371.1226537	-1.97716355	0.464623073	-4.254575575	2.09E-05	0.001430634
511	ZK381.8	254.9322139	-2.161119085	0.519529881	-4.158102315	3.21E-05	0.001989265
512	ZK384.7	829.4006099	1.569272237	0.33283644	4.714330728	2.43E-06	0.00028504
513	ZK402.3	328.5573298	2.073778536	0.471791743	4.394483469	1.11E-05	0.000870074
514	ZK402.5	58.88444552	1.865368781	0.5483003	3.395099999	0.000686035	0.017185066
515	ZK512.7	3417.305946	-2.160536357	0.329048998	-6.565597942	5.18E-11	3.03E-08
516	ZK546.18	32.77552439	2.115071227	0.490350839	4.284052296	1.84E-05	0.001302702
517	ZK596.2	577.1198033	-1.831348055	0.510886233	-3.585032728	0.000337036	0.010797677
518	ZK6.6	343.912388	1.511598036	0.450991122	3.351323884	0.000804262	0.019282043
519	ZK6.8	116.0342475	-2.491884174	0.366953724	-6.765514265	1.33E-11	9.62E-09
520	ZK622.1	288.4198079	-1.804590766	0.614376552	-2.94137605	0.003267576	0.046208117
521	ZK666.2	67.87840142	-2.521167147	0.515122332	-4.872380897	1.10E-06	0.000157153
522	ZK688.4	41.94518897	-1.834345776	0.504133884	-3.629020573	0.000284499	0.009571949
523	ZK697.16	6.407644738	2.543394649	0.780456431	3.265331249	0.001093361	0.022696024
524	ZK813.7	3034.730482	-1.938656996	0.786836605	-3.212437374	0.001316138	0.02558899
525	ZK856.18	338.2503192	-1.602362975	0.419264603	-3.821190605	0.000132809	0.005590639
526	ZK856.6	24.22025695	1.530826126	0.490027947	3.112213102	0.001856904	0.032226098
527	ZK858.2	777.1961123	-2.159492678	0.534597406	-4.040978414	5.32E-05	0.002921509
528	ZK892.3	252.941104	-1.880075461	0.402040113	-4.674256857	2.95E-06	0.00033376
529	ZK896.5	265.3423218	-1.864411232	0.436401265	-4.268332528	1.97E-05	0.001365825
530	ZK938.1	5746.935249	-2.117927214	0.54361516	-3.898303398	9.69E-05	0.004427843
531	abu-1	538.4606132	-3.200294134	0.671419389	-4.803715559	1.56E-06	0.000199943
532	abu-10	2496.758834	-2.723548646	0.633245673	-4.316046254	1.59E-05	0.001145546
533	abu-11	1254.360821	-1.94701569	0.614365922	-3.17318549	0.001507762	0.028107099
534	abu-15	840.3823849	-2.845588294	0.634802931	-4.498067319	6.86E-06	0.000617541
535	abu-4	35.71132912	-2.90865545	0.719362618	-4.024317395	5.71E-05	0.003078291
536	abu-6	187.336199	-2.793451667	0.75544393	-3.806425038	0.00014099	0.005800136
537	abu-7	824.4576165	-2.946895202	0.674396934	-4.402226995	1.07E-05	0.000854378
538	abu-8	3070.500771	-2.241674301	0.645903418	-3.480758024	0.000499997	0.013966737
539	acbp-4	250.7033448	-1.883307857	0.430967103	-4.368675951	1.25E-05	0.000946721
540	acdh-5	588.7593565	-1.564801893	0.45055409	-3.473184205	0.000514322	0.014165264
541	acp-3	669.6147136	-2.121262171	0.488101106	-4.346104232	1.39E-05	0.001032254
542	acr-9	107.7012758	-1.52108278	0.453930108	-3.349454283	0.000809709	0.019308966
543	acs-2	3014.880485	1.954449024	0.560733907	3.487800598	0.000487011	0.01376446
544	amt-1	74.6628102	2.298683589	0.646410947	3.55209093	0.000382183	0.011725238
545	amx-2	598.8855138	-1.639825797	0.504033439	-3.25317376	0.001141237	0.023421234
546	anp-1	1783.11055	-1.575424693	0.43970625	-3.583029469	0.000339632	0.010842476
547	aqp-3	61.85023835	-1.544160635	0.513733671	-3.002148688	0.002680812	0.040404145
548	arf-1.1	1382.21961	-1.506638933	0.326995733	-4.607327898	4.08E-06	0.000437789
549	arrd-11	50.75326707	3.54766629	0.654089464	5.310562586	1.09E-07	2.67E-05
550	asic-1	97.34198073	-1.663384593	0.486387636	-3.414632656	0.000638681	0.016351856
551	asic-2	205.9395844	1.839226245	0.557631993	3.297951038	0.000973931	0.021302531
552	asp-17	109.2102146	-2.785887061	0.701962655	-3.981132949	6.86E-05	0.003477601
553	best-20	277.3345029	-1.932153221	0.646505588	-2.99521567	0.002742509	0.04101546
554	best-5	423.835083	1.783458181	0.515051783	3.462890584	0.000534406	0.01454152
555	bgnt-1.3	36.12885887	-3.191828633	0.722197537	-4.319584871	1.56E-05	0.001131841
556	bli-5	419.9638704	-1.711158005	0.515217554	-3.321519007	0.000895289	0.020502626
557	btb-16	2568.257467	1.71020508	0.282748991	6.04822898	1.46E-09	6.63E-07
558	ced-11	164.6665702	-1.533908407	0.494126464	-3.103184118	0.001914505	0.032647733
559	ceh-86	31.25383716	1.926743921	0.619337055	3.094664821	0.001970354	0.033124916
560	cest-1	407.0630413	-3.536401044	0.691738571	-5.168228191	2.36E-07	4.74E-05
561	chhy-1	135.1328842	-2.488175858	0.66846041	-3.731495217	0.000190347	0.00715878
562	chil-7	38.3134213	1.789912587	0.564394282	3.164502836	0.001553481	0.028649086
563	chs-1	4706.004228	-1.643441959	0.557884022	-2.947127222	0.003207412	0.045570932
564	cht-3	720.4227148	-3.648066481	0.740422947	-5.148606057	2.62E-07	5.05E-05
565	clec-167	216.0270992	-1.995411077	0.631106246	-3.16292809	0.001561909	0.028731825
566	clec-175	192.9572194	-1.766866151	0.527373501	-3.350484145	0.000806704	0.019289503
567	clec-218	3021.456929	1.65674516	0.432220178	3.833262574	0.000126455	0.005375089
568	clec-223	169.7633755	-2.760325327	0.757869682	-3.768173403	0.000164446	0.006415184
569	clec-239	98.41697853	-2.00774873	0.646093815	-3.111733799	0.001859921	0.032247544
570	clec-33	72.74821766	2.303346296	0.575899647	3.985784445	6.73E-05	0.003438894
571	clec-39	12.7086763	2.527395723	0.775967852	3.186536723	0.001439872	0.027377232
572	clec-45	32.93164772	2.725122507	0.615438344	4.379387433	1.19E-05	0.000916707
573	clec-68	19.4978878	-4.275783727	0.741729143	-5.300889882	1.15E-07	2.74E-05
574	clec-7	705.555373	1.715247487	0.550660345	3.115484857	0.001836428	0.031993435
575	clec-74	15.20792178	-2.387032615	0.763525499	-3.070551579	0.002136638	0.034779928
576	clec-88	2235.570186	-2.629828537	0.695175337	-3.817482294	0.00013482	0.005623007
577	clec-91	1793.34396	-2.155688157	0.66449063	-3.255950887	0.001130133	0.023299017
578	cnc-2	1175.823444	2.25427075	0.555077491	4.063754009	4.83E-05	0.002723029
579	col-106	3484.04554	-2.05103024	0.790368623	-3.270135859	0.001074958	0.022430189
580	col-113	739.4189992	-2.152426865	0.661076891	-3.266766597	0.001087833	0.022607199
581	col-116	8.846521308	-2.686489979	0.76072109	-3.252031893	0.001145832	0.023462329
582	col-12	6929.160393	-3.198541696	0.634489828	-5.067312032	4.03E-07	7.16E-05
583	col-120	25342.53011	-3.26852715	0.722861939	-4.635301477	3.56E-06	0.000391001
584	col-122	9409.043308	-2.21754383	0.79290369	-3.431703355	0.000599803	0.015587977
585	col-123	246.2946296	-5.27549623	0.65101806	-7.825567808	5.05E-15	7.07E-12
586	col-124	74909.9013	-2.277501328	0.793418724	-3.461665096	0.000536845	0.01454152
587	col-127	35.60768232	-2.458344553	0.758557041	-3.260542455	0.001111993	0.022951184
588	col-129	54732.52888	-1.88813936	0.784114964	-3.247965167	0.001162335	0.023613272
589	col-13	1179.53829	-2.569951424	0.640365559	-4.026082804	5.67E-05	0.003064403
590	col-133	15590.99474	-2.985521691	0.615848252	-4.864524218	1.15E-06	0.000159227
591	col-135	634.8156789	-1.75884844	0.778543394	-3.122192717	0.001795094	0.031515999
592	col-137	1337.94998	-2.779879307	0.793533306	-5.187758472	2.13E-07	4.38E-05
593	col-139	58190.06725	-2.00314404	0.788230367	-3.31922134	0.000902688	0.020548033
594	col-140	68044.74225	-2.171478844	0.791962711	-3.451851189	0.000556755	0.014932015
595	col-143	2320.567494	-2.212705225	0.793526865	-3.217025435	0.001295271	0.025357781
596	col-145	15374.26737	-1.800091139	0.520198161	-3.461411406	0.000537351	0.01454152
597	col-152	1119.972901	-3.726700596	0.759132621	-5.313537584	1.08E-07	2.67E-05
598	col-154	7643.065328	-1.858053672	0.472270398	-3.934819916	8.33E-05	0.003986966
599	col-155	11870.06471	-1.924433103	0.494013917	-3.896360527	9.76E-05	0.004441067
600	col-156	5962.683692	-2.62650908	0.693804181	-3.819602912	0.000133667	0.005600696
601	col-157	14168.09916	-2.503614563	0.511798752	-4.894270027	9.87E-07	0.000145207
602	col-158	1170.815601	-2.518861728	0.477587874	-5.274206003	1.33E-07	3.02E-05
603	col-161	42682.86659	-3.063586722	0.656109197	-4.701037054	2.59E-06	0.000300341
604	col-162	27679.7657	-3.049991039	0.682029556	-4.517657767	6.25E-06	0.000577454
605	col-163	29.35920138	-3.870595569	0.689573539	-5.059680765	4.20E-07	7.31E-05
606	col-178	14796.11894	-2.186052268	0.791563179	-3.559417339	0.000371678	0.011461248
607	col-179	4175.136741	-3.583520721	0.707666623	-5.179281768	2.23E-07	4.53E-05
608	col-180	4391.52665	-1.94165995	0.519844173	-3.736188117	0.000186831	0.007074951
609	col-181	9540.636159	-2.219198313	0.793528719	-3.232958543	0.001225153	0.024369782
610	col-183	875.9635941	-1.910145364	0.788899106	-2.973636591	0.002942934	0.043029117
611	col-184	33640.08607	-3.086659425	0.742176882	-4.298037958	1.72E-05	0.001232847
612	col-185	684.8940705	-1.983296503	0.790802907	-3.03696902	0.0023897	0.037357653
613	col-186	170.713664	-1.960889333	0.588974816	-3.329468401	0.000870119	0.020114982
614	col-19	12395.17175	-1.666604579	0.773459768	-3.049837394	0.002289653	0.036228154
615	col-20	19874.14242	-2.141689098	0.791007552	-3.489561014	0.000483815	0.013719835
616	col-36	1198.821076	-2.533303672	0.710282697	-3.604503896	0.00031275	0.010166587
617	col-40	1014.304517	-2.256339432	0.756555398	-3.049038996	0.002295747	0.03629285
618	col-43	719.5912663	-2.260571241	0.59031273	-3.833173568	0.000126501	0.005375089
619	col-44	301.37757	-2.232578142	0.772396266	-2.985959371	0.002826902	0.041875836
620	col-45	180.8437373	-2.652061335	0.425836388	-6.210796687	5.27E-10	2.65E-07
621	col-50	678.494808	-2.641479087	0.752575882	-3.609184815	0.000307161	0.010073325
622	col-58	2527.48008	-2.278013214	0.614543265	-3.71386803	0.000204115	0.007494301
623	col-60	7553.924437	-3.170900377	0.73776686	-4.435966302	9.17E-06	0.000757599
624	col-61	274.9029454	-2.276662751	0.612151491	-3.722350521	0.000197377	0.007366426
625	col-62	1769.01916	-2.279001805	0.793036203	-3.573912934	0.000351686	0.011096422
626	col-65	13526.30088	-2.166369496	0.679131083	-3.20501651	0.001350547	0.026117796
627	col-7	1683.005653	-1.548997388	0.764492298	-3.030957009	0.0024378	0.037844434
628	col-8	1661.22134	-2.075262436	0.786529135	-3.890507026	0.000100035	0.004509389
629	col-81	35165.8655	-1.886187563	0.783106237	-3.331178604	0.000864791	0.020043262
630	col-88	2328.08655	-3.536325813	0.758042757	-4.997927851	5.79E-07	9.54E-05
631	col-89	994.131966	-1.713063507	0.560086475	-3.059843763	0.002214525	0.03556798
632	col-91	13234.94807	-2.640908794	0.670266718	-3.964426402	7.36E-05	0.003638629
633	col-95	172.6600815	-2.999190799	0.739204328	-4.14585328	3.39E-05	0.002070305
634	col-96	1017.124175	-3.108018702	0.722299767	-4.392490545	1.12E-05	0.000874306
635	cpg-2	2458.233104	-1.848855018	0.629767404	-2.940425773	0.003277615	0.046313906
636	cpg-3	5477.661112	-1.979912995	0.639515585	-3.102549228	0.001918616	0.032647733
637	cpg-7	2108.967306	-1.996235973	0.583365899	-3.425107352	0.000614557	0.015891554
638	cpr-2	278.6372709	4.873845069	0.622045839	7.736692488	1.02E-14	1.15E-11
639	cpr-5	236379.8779	1.730896973	0.438138504	3.950896198	7.79E-05	0.003798726
640	ctl-1	139.5566037	1.511036505	0.443508781	3.40573073	0.000659872	0.01668205
641	cut-4	310.4359089	-2.177994273	0.60887691	-3.580400497	0.000343068	0.010909973
642	cutl-12	545.7645042	-2.084480381	0.552051202	-3.776863286	0.000158816	0.006272791
643	cutl-7	13.60669805	3.450556229	0.732534689	4.219025005	2.45E-05	0.001625597
644	cutl-8	468.446023	-1.802573518	0.445950523	-4.04159836	5.31E-05	0.002921509
645	cyp-13A12	2596.244396	2.413557554	0.653421778	3.708075929	0.00020884	0.007560427
646	cyp-13B1	4267.68913	2.215920441	0.551258789	4.022508782	5.76E-05	0.003092827
647	cyp-25A3	905.0836143	2.083754797	0.547992241	3.804204832	0.00014226	0.005829273
648	cyp-29A2	14021.6166	1.832349457	0.485591539	3.774139289	0.000160561	0.006304372
649	cyp-34A1	30.61875162	2.646312714	0.771754282	3.497385368	0.000469843	0.013478004
650	cyp-34A5	252.8082766	1.867354378	0.532951071	3.502311841	0.000461239	0.013294419
651	cyp-34A9	2158.565645	1.967507264	0.505326357	3.894427947	9.84E-05	0.004454237
652	cyp-35B2	34.49636564	-2.617278524	0.702510186	-3.715681071	0.000202657	0.007461359
653	cyp-37B1	806.4766383	-1.839902113	0.494446133	-3.721125373	0.000198337	0.007371862
654	dct-19	8.219592005	2.325244761	0.760890037	2.933727623	0.00334918	0.046958561
655	dct-5	1718.667154	-3.163741864	0.747989049	-4.397468909	1.10E-05	0.000866889
656	dct-7	526.0709413	2.730251839	0.62693105	4.366913229	1.26E-05	0.000950414
657	dct-8	120.0022143	2.392286478	0.710586911	3.394433587	0.000687707	0.017193629
658	ddn-1	66.57684455	1.601679386	0.502704487	3.178994298	0.00147787	0.027757403
659	ddo-3	1888.099939	-2.814705179	0.682666018	-4.15829105	3.21E-05	0.001989265
660	decr-1.1	1151.587137	-2.835329344	0.581209717	-4.884050431	1.04E-06	0.00015171
661	deg-1	184.1539132	-1.690475651	0.422194352	-4.000631284	6.32E-05	0.003276526
662	dhs-18	9422.853743	1.568955026	0.443011966	3.541797436	0.000397411	0.011986235
663	dod-20	227.2999731	-1.639925211	0.469007676	-3.494230762	0.00047543	0.013573748
664	dod-23	74.68987725	-2.218011557	0.787995676	-2.990934061	0.002781255	0.041434983
665	dod-3	1466.545964	3.079952817	0.440769546	6.986781939	2.81E-12	2.12E-09
666	dop-4	21.262701	-1.871265649	0.563702244	-3.287321939	0.001011451	0.021795572
667	dos-1	422.2936822	-1.510268839	0.304505878	-4.95878957	7.09E-07	0.00011165
668	dpf-2	1376.454424	-1.959891185	0.492572721	-3.979319781	6.91E-05	0.003484706
669	dpr-1	212.6544839	-5.430545978	0.620702643	-8.293369092	1.10E-16	2.85E-13
670	dpy-14	121.4491894	1.824810747	0.621458705	2.939077702	0.003291905	0.046418246
671	dpy-17	309.7727823	2.278806691	0.435593107	5.229433961	1.70E-07	3.66E-05
672	dsl-7	182.7870773	-2.103905226	0.613025835	-3.431509027	0.000600233	0.015587977
673	dylt-3	173.1257349	-1.825735183	0.487037236	-3.745951229	0.000179712	0.006862781
674	efn-3	12.62204117	-2.643636896	0.759402568	-3.344032741	0.0008257	0.01956282
675	egg-2	359.6601355	-1.930696222	0.607127172	-3.183086535	0.001457141	0.027564859
676	eol-1	40.12300857	1.864579099	0.565942513	3.280422327	0.001036518	0.022063105
677	far-3	7342.203921	1.78448811	0.467964601	3.813743547	0.000136878	0.00566961
678	far-4	65.83271383	3.021820178	0.68437399	4.396222462	1.10E-05	0.000866889
679	fbxa-147	64.81701322	-3.158584382	0.678286456	-4.611329698	4.00E-06	0.000433667
680	fbxa-194	6.265741128	2.409156134	0.739413091	3.082703802	0.002051292	0.034001072
681	fbxa-21	171.3599396	2.156793357	0.485462853	4.440030965	8.99E-06	0.000749852
682	fbxa-215	295.5138437	-2.160567503	0.55224286	-3.911659079	9.17E-05	0.004265333
683	fbxa-24	1910.240876	2.518811637	0.495275317	5.086929879	3.64E-07	6.59E-05
684	fbxa-76	53.84023348	-1.647353541	0.564828077	-2.909848207	0.003616043	0.049548827
685	fbxa-83	89.09269413	2.337779892	0.68276408	3.43523612	0.000592038	0.015486236
686	fbxa-88	31.92079716	-2.153190682	0.739603521	-2.906364868	0.003656548	0.049914913
687	fbxa-99	32.65577862	-1.643663079	0.430377433	-3.800540277	0.000144381	0.005886125
688	fbxc-40	20.56429962	2.182731082	0.726726734	2.989606657	0.002793369	0.041547061
689	fipr-11	749.9419703	-2.548226882	0.516065913	-4.936827399	7.94E-07	0.000122845
690	fipr-13	172.6258085	-2.565212365	0.705264163	-3.661671988	0.000250575	0.008639333
691	fipr-24	753.7712967	2.675878615	0.656036139	4.097050755	4.18E-05	0.002459192
692	fipr-6	1240.747202	-1.692203032	0.558665532	-3.02989229	0.00244641	0.037913066
693	fipr-8	490.6832537	-2.516745922	0.579187307	-4.346307555	1.38E-05	0.001032254
694	fkb-8	218.3315787	1.503341692	0.323712264	4.643045655	3.43E-06	0.000381243
695	fmo-5	3169.259448	2.246720842	0.456244548	4.925078947	8.43E-07	0.000128268
696	folt-3	15.02839927	2.159890143	0.793258176	3.050667783	0.002283331	0.036176413
697	ftn-1	559.8102775	3.085634281	0.521224123	5.916727499	3.28E-09	1.38E-06
698	fut-4	41.2393312	-2.626328795	0.738904818	-3.554601619	0.000378552	0.011633571
699	gadr-5	144.3848766	2.392266337	0.564858572	4.226808794	2.37E-05	0.001577375
700	gcy-2	47.64648717	-1.58210125	0.479906535	-3.291987725	0.00099482	0.021565543
701	gcy-5	200.6393064	2.12506432	0.642054504	3.317655459	0.000907764	0.020548033
702	gly-1	292.8298497	-3.275478949	0.642019004	-5.108647534	3.24E-07	5.99E-05
703	gly-18	30.20150087	-1.81875721	0.601541423	-3.015665433	0.00256416	0.039167817
704	gly-2	239.394509	-2.039745004	0.560048869	-3.642349435	0.000270161	0.009167319
705	gna-2	1077.207996	-2.145939119	0.53080656	-4.044047272	5.25E-05	0.002917055
706	gpx-5	4060.995791	-1.650966879	0.453152237	-3.643564354	0.000268888	0.009152125
707	grd-14	4489.268628	-2.166339004	0.680454175	-3.198882638	0.001379613	0.026538128
708	grd-15	283.5314562	-1.827680872	0.589145684	-3.103369176	0.001913308	0.032647733
709	grd-6	5497.345645	-3.109693145	0.693203224	-4.542973147	5.55E-06	0.0005427
710	grl-21	1816.411596	-1.84445915	0.593565614	-3.109894805	0.00187154	0.032386943
711	grl-22	234.88042	-1.64743133	0.511603112	-3.220070245	0.001281592	0.025185798
712	grl-24	23.68516711	-2.230094416	0.793535173	-3.044042137	0.002334224	0.036708772
713	grl-27	3146.979267	-3.871585316	0.731577397	-5.529922777	3.20E-08	1.00E-05
714	grl-28	36.24152066	-3.764810855	0.778000296	-5.057101308	4.26E-07	7.31E-05
715	grl-3	50.59271554	-1.938325085	0.523468096	-3.685429165	0.000228318	0.008087625
716	grl-4	829.7395168	-2.462024114	0.63582942	-3.881793555	0.000103689	0.004645724
717	grl-9	76.81461948	-2.728313839	0.584349212	-4.63273415	3.61E-06	0.000393498
718	gyg-2	249.6615683	-1.846056901	0.601416757	-3.071110472	0.002132642	0.03477744
719	hach-1	4125.949319	2.026802448	0.286214328	7.081210447	1.43E-12	1.12E-09
720	his-42	23.25031061	2.931201594	0.610180124	4.692044253	2.70E-06	0.000309881
721	hrg-2	9801.694776	1.903161179	0.598018865	3.185821601	0.001443436	0.027416192
722	hst-3.1	37.20219126	-1.844044911	0.630723912	-2.907737641	0.003640536	0.049771409
723	htas-1	1072.859137	-1.684221484	0.472913402	-3.561776331	0.000368354	0.01139757
724	ins-11	596.6238837	1.605299873	0.491020654	3.269061147	0.00107905	0.022450437
725	ins-23	52.97737161	-1.910415246	0.651163119	-2.92497746	0.003444812	0.047744669
726	ins-4	32.07487869	-3.137095629	0.691317219	-4.414025903	1.01E-05	0.000819925
727	ins-5	26.38713834	-2.790961776	0.661106786	-4.130131341	3.63E-05	0.002187542
728	inx-18	1731.007362	-2.3037173	0.517221166	-4.455840997	8.36E-06	0.000713495
729	inx-20	103.2531047	-2.004136939	0.533201518	-3.753705346	0.00017424	0.006682017
730	irg-4	9907.844439	1.51259102	0.457073051	3.309578266	0.000934366	0.020866857
731	irld-18	307.6866503	-1.748018985	0.473308259	-3.693358519	0.000221312	0.007885753
732	irld-4	214.2529717	-1.825912048	0.422209909	-4.322903557	1.54E-05	0.00112653
733	irld-47	17.0352014	2.253789561	0.791684572	3.0542919	0.002255925	0.035914241
734	irld-8	406.0064952	-1.56694711	0.362568438	-4.32126431	1.55E-05	0.00112777
735	jud-4	606.3568222	-2.369828551	0.677154427	-3.516512528	0.000437256	0.01282783
736	kreg-1	239.3039428	2.720752862	0.608796805	4.474089016	7.67E-06	0.000667803
737	lact-2	1778.298257	-1.599719653	0.495289955	-3.230209079	0.001236997	0.024578361
738	lad-2	237.7247749	-1.711577802	0.376083834	-4.548225257	5.41E-06	0.000532211
739	lfor-1	233.6639468	1.519261467	0.30489176	4.981545871	6.31E-07	0.000101945
740	lgc-13	51.49852665	-2.62911029	0.727441181	-3.615580528	0.000299675	0.00993484
741	lgc-21	1663.753312	-2.648840907	0.626198186	-4.242478453	2.21E-05	0.001487544
742	lgc-33	88.53756245	-1.654530498	0.513340649	-3.219783546	0.001282874	0.025185798
743	linc-108	41.09357204	2.067402951	0.601808146	3.42626427	0.000611945	0.015846653
744	linc-130	20.51354005	2.024392057	0.584713678	3.440530632	0.000580575	0.015316023
745	linc-50	20.88455216	1.856165061	0.588505087	3.131239678	0.0017407	0.031068248
746	lipl-1	1118.222983	-1.76563223	0.449915361	-3.92417582	8.70E-05	0.004131172
747	lipl-4	194.7014091	1.65559995	0.549419466	3.01326405	0.002584539	0.039445823
748	lipl-8	18.36181718	-2.321069203	0.792995052	-3.314403442	0.000918389	0.020727878
749	lips-17	984.5566564	-2.195999662	0.638616217	-3.446249651	0.000568425	0.015135811
750	lron-6	74.84156659	-2.029135771	0.53722649	-3.768670376	0.000164119	0.006415184
751	lsy-27	110.5868797	-2.23309323	0.760486005	-2.998515756	0.002712981	0.040685728
752	lys-3	459.7828941	1.531350908	0.442834964	3.457729515	0.000544748	0.014695207
753	math-48	139.708537	-1.757525029	0.58370198	-3.011326468	0.00260109	0.039598264
754	meg-4	33.97719376	-3.015619363	0.782446712	-3.919940868	8.86E-05	0.004153415
755	mir-238	60.9151913	2.08389069	0.593125384	3.513906702	0.000441568	0.0128498
756	msd-1	95.21752684	-1.939900286	0.641295378	-3.031134549	0.002436367	0.037844434
757	msd-2	654.6886748	-1.92120123	0.567957168	-3.384947463	0.000711919	0.017623822
758	msp-10	599.6460959	-2.260866329	0.586107784	-3.861911075	0.000112504	0.004918904
759	msp-113	2276.502292	-1.862635465	0.550470514	-3.385442901	0.000710635	0.017620826
760	msp-152	10754.36931	-1.713316046	0.577731694	-2.9675137	0.003002189	0.043543769
761	msp-33	8482.315617	-1.657450962	0.565527527	-2.932298158	0.003364636	0.04702955
762	msp-38	7073.317354	-1.788404662	0.584502159	-3.062091217	0.002197965	0.035364762
763	msp-49	7248.604688	-1.883316575	0.565205815	-3.334260324	0.000855266	0.01997062
764	msp-50	14711.83609	-1.66778195	0.545885493	-3.056367536	0.002240364	0.035824061
765	msp-51	1974.455403	-1.909406693	0.548922737	-3.480247753	0.00050095	0.013968773
766	msp-55	4101.476989	-1.962226792	0.564300076	-3.479675547	0.000502021	0.013968773
767	msp-59	19720.96534	-1.689197072	0.553126191	-3.055253983	0.0022487	0.035906287
768	msp-63	176.3930676	-3.468959637	0.468042054	-7.371005218	1.69E-13	1.53E-10
769	msp-64	3463.82444	-1.827660126	0.552440218	-3.310028924	0.000932863	0.020866857
770	msp-65	3425.580334	-2.422181557	0.605111905	-4.010489906	6.06E-05	0.003188349
771	msp-76	4560.64625	-1.777238675	0.568265868	-3.129380259	0.001751755	0.031075173
772	msp-77	1860.032319	-1.669075371	0.57254886	-2.916877374	0.003535547	0.048778158
773	msp-78	2144.353227	-2.057270892	0.560288409	-3.674415148	0.000238395	0.008411667
774	msp-79	630.0130374	-1.962046534	0.529198005	-3.708869933	0.000208186	0.007551865
775	msrp-5	2876.600258	-1.753738972	0.569373864	-3.081957846	0.00205644	0.034001072
776	mup-4	8900.815008	-1.862905311	0.608642405	-3.064371363	0.00218128	0.035334902
777	nas-1	845.5161868	-2.488804477	0.677230527	-3.695260108	0.000219662	0.007857901
778	nas-13	74.2666102	-1.913881974	0.549788516	-3.473394699	0.000513919	0.014165264
779	nas-20	925.7436776	-2.188402935	0.789148114	-4.0134945	5.98E-05	0.003157194
780	nas-22	1396.270468	-2.029725183	0.792720531	-2.995046293	0.002744032	0.04101546
781	nas-27	97.94717048	-3.022553053	0.746832475	-4.13312139	3.58E-05	0.002166487
782	nas-30	1068.691444	-2.694484351	0.643278427	-4.204260237	2.62E-05	0.001705514
783	nas-38	1560.711269	-1.743162988	0.51106539	-3.411542556	0.000645964	0.016468447
784	nas-7	448.728695	-2.279000891	0.632759911	-3.608689117	0.000307748	0.010073325
785	nep-10	351.7257467	-1.98051283	0.373594061	-5.298819024	1.17E-07	2.74E-05
786	nep-4	212.0640875	-2.129866949	0.69649546	-3.072215968	0.002124759	0.034680134
787	nex-3	248.9501108	-1.89980374	0.55914733	-3.398310962	0.000678033	0.017022297
788	nhr-120	159.6155801	1.533772958	0.442331762	3.465872175	0.000528514	0.014451119
789	nhr-127	23.72224744	-2.816230576	0.572800895	-4.770084425	1.84E-06	0.000226753
790	nhr-155	51.82695226	2.35451749	0.624568253	3.746958185	0.000178992	0.006849752
791	nhr-225	84.30032216	-1.614275614	0.515023898	-3.127502072	0.001762986	0.031103548
792	nhr-253	4.113104174	2.371466815	0.793499591	3.144876621	0.001661569	0.0299861
793	nhx-6	13.82793887	-3.433807383	0.777716239	-4.41842242	9.94E-06	0.000810664
794	nos-2	635.3085428	-2.325826989	0.7023953	-3.337267215	0.000846066	0.019880659
795	nspa-1	33.72013338	-2.115845202	0.685137983	-3.094444895	0.001971816	0.033124916
796	nspa-3	32.82453993	-2.292888792	0.672866787	-3.403825549	0.000664492	0.016752041
797	nspa-5	416.2148064	-2.220429538	0.696774577	-3.208224099	0.001335574	0.025883536
798	nspa-8	589.7122396	-4.331633803	0.582467966	-7.438630192	1.02E-13	9.69E-11
799	nspb-1	79.096974	-3.037941829	0.626207147	-4.810892455	1.50E-06	0.000194273
800	nspb-10	510.5824306	-3.324698101	0.621477969	-5.363557304	8.16E-08	2.20E-05
801	nspb-11	690.6536979	-2.500569694	0.613568096	-4.082004295	4.46E-05	0.002590356
802	nspb-12	1985.955542	-2.353487258	0.610265682	-3.863238926	0.000111893	0.004918904
803	nspb-2	372.125409	-3.653448389	0.643355055	-5.69072854	1.26E-08	4.49E-06
804	nspb-3	254.7549549	-3.837461441	0.627584744	-6.10451784	1.03E-09	4.91E-07
805	nspb-4	118.0448627	-2.731853751	0.489868756	-5.550331837	2.85E-08	9.22E-06
806	nspb-5	15.09034008	-3.310817119	0.711051478	-4.153580833	3.27E-05	0.002015199
807	nspb-6	1550.221909	-2.164204536	0.578877467	-3.741644474	0.00018282	0.00696679
808	nspb-7	364.731336	-3.924751657	0.597937337	-6.555380282	5.55E-11	3.14E-08
809	nspb-8	827.9655731	-3.1822206	0.59866033	-5.326000845	1.00E-07	2.56E-05
810	nspb-9	180.1649139	-2.914231143	0.645692092	-4.51857098	6.23E-06	0.000577454
811	nspd-10	2973.191619	-2.107921679	0.59051384	-3.57376672	0.000351882	0.011096422
812	nspd-9	107.3633618	-2.557053701	0.55945833	-4.560771858	5.10E-06	0.000509687
813	nspe-1	965.1342384	-1.911099522	0.36453401	-5.241757758	1.59E-07	3.48E-05
814	nspe-5	112.3217209	-2.272728805	0.432168045	-5.241308419	1.59E-07	3.48E-05
815	nspe-7	805.7022262	-2.570214938	0.568916248	-4.521045367	6.15E-06	0.000577454
816	oac-10	813.2167793	-2.16482602	0.647432514	-3.353145257	0.000798988	0.019206474
817	oac-12	156.0358162	-1.820445829	0.543030469	-3.350539649	0.000806543	0.019289503
818	oac-21	16.03514621	1.998540185	0.666827096	2.960745442	0.003068955	0.044100329
819	oac-30	372.9848925	-2.318278539	0.595139982	-3.900080837	9.62E-05	0.004406589
820	oac-32	16.76826373	-2.383298458	0.771699733	-3.128875758	0.001754765	0.031079255
821	oac-51	341.7286193	-1.656068805	0.536474506	-3.085910978	0.002029296	0.033823463
822	oac-54	53.05380835	2.531279619	0.655016116	3.846522139	0.000119806	0.00517569
823	oac-56	12.70842305	-3.09164157	0.703776189	-3.977212019	6.97E-05	0.003505962
824	oma-2	485.2515431	-1.934830173	0.586052977	-3.303524196	0.000954777	0.021127658
825	otpl-7	44.95644665	-2.266100838	0.78610345	-3.038913931	0.002374327	0.037177932
826	otpl-8	57.10909541	-2.290825873	0.453688014	-5.018565036	5.21E-07	8.73E-05
827	pals-32	61.82110387	1.93533709	0.599325823	3.221776086	0.001273987	0.025065685
828	perm-2	6955.723383	-2.736243005	0.707493196	-3.91608682	9.00E-05	0.004209434
829	perm-4	8714.480482	-3.177088806	0.706328774	-4.574787714	4.77E-06	0.000482056
830	pes-23	529.003673	-3.42710415	0.750595638	-4.792175725	1.65E-06	0.000207385
831	phat-5	50.18971603	2.603279443	0.499874156	5.16671209	2.38E-07	4.74E-05
832	piit-1	645.5856158	-2.552779666	0.577885324	-4.420063416	9.87E-06	0.000808172
833	pitr-2	8.532155521	2.618461442	0.788795179	3.330186118	0.00086788	0.020088858
834	pitr-3	408.1670065	-2.183313958	0.691527116	-3.173443852	0.00150642	0.028107099
835	pos-1	386.792739	-1.829888247	0.609186499	-3.006390406	0.002643693	0.040145548
836	pqn-2	716.7365576	-3.313910514	0.697008701	-4.824117515	1.41E-06	0.000185799
837	pqn-54	1335.010889	-2.588343647	0.635085373	-4.088454792	4.34E-05	0.002542691
838	pqn-71	890.2971266	-2.064333077	0.643397632	-3.215194395	0.001303562	0.025453914
839	pqn-72	375.8932218	-2.077630774	0.68698736	-3.036679551	0.002391996	0.037357653
840	pqn-8	301.373736	-1.64890304	0.4646934	-3.546833512	0.000389891	0.011891751
841	ptr-23	1485.669559	-1.893603998	0.578375363	-3.276226137	0.001052043	0.022162851
842	ptr-3	324.1922574	-2.177859455	0.593410048	-3.672702101	0.000239999	0.008451801
843	pud-3	45.57661272	-2.353602426	0.551423378	-4.230554709	2.33E-05	0.001557058
844	puf-5	1045.656138	-2.266430191	0.675155641	-3.373181328	0.00074305	0.018203311
845	puf-6	174.9712126	-1.660693782	0.552037922	-3.008141095	0.002628511	0.039982078
846	puf-7	159.7741199	-1.582450434	0.469954933	-3.365055929	0.000765281	0.018668948
847	pzf-1	44.95638571	-2.431599179	0.793268262	-3.524223573	0.000424726	0.012514188
848	ram-5	91.60819869	-2.289139501	0.601842713	-3.794238005	0.000148098	0.005997123
849	rgs-11	94.9878727	-2.355824543	0.717897903	-3.309370937	0.000935059	0.020866857
850	rmd-1	3973.62186	-1.887851117	0.575572498	-3.282409474	0.00102924	0.021969668
851	scl-24	42.55989078	2.868328438	0.715284223	4.051779264	5.08E-05	0.002848504
852	scl-25	28.78328245	2.304140794	0.758892521	3.061236541	0.002204249	0.035434376
853	scvp-1	137.3113105	-2.384951419	0.694100658	-3.45141709	0.000557651	0.014932015
854	sek-6	273.8335788	1.578858992	0.475444589	3.319935265	0.000900383	0.020548033
855	sex-1	150.7501374	-1.872680432	0.510052618	-3.66756298	0.000244873	0.008504544
856	skpo-1	607.7898351	-3.357639424	0.699399374	-4.869864987	1.12E-06	0.000157451
857	slc-28.1	59.67909544	-2.242068355	0.548516834	-4.072573816	4.65E-05	0.002654992
858	slc-36.5	325.7126213	2.240181366	0.495590065	4.518590434	6.23E-06	0.000577454
859	slcf-2	476.3204265	-1.737032924	0.430577642	-4.033969893	5.48E-05	0.002990064
860	snf-10	445.4331603	-1.79715979	0.428899716	-4.189870041	2.79E-05	0.001785246
861	snf-9	2493.150789	-1.857146477	0.54331152	-3.419742457	0.000626804	0.016129037
862	snpc-1.3	87.10144228	2.104312892	0.491351216	4.273512377	1.92E-05	0.001350227
863	sod-3	96.78972152	-1.538165556	0.405281553	-3.789588606	0.000150897	0.006033445
864	spe-12	190.7821798	-2.031098391	0.408681244	-4.96466967	6.88E-07	0.000110237
865	spsb-2	879.2970855	-2.110297074	0.666504952	-3.177266161	0.001486705	0.027858025
866	sra-3	20.80778115	-2.886859523	0.725157983	-3.847319607	0.000119417	0.005171219
867	srbc-67	24.61161888	-2.240322568	0.750940019	-2.978258095	0.002898918	0.042633505
868	srd-12	28.38528013	1.594063351	0.541800345	2.933946681	0.003346817	0.046958561
869	srd-28	132.0755416	3.255993738	0.723320465	4.558158563	5.16E-06	0.000510429
870	sre-10	16.52218651	2.77089899	0.666321727	4.020093675	5.82E-05	0.003101604
871	sre-51	6.09201497	-2.276526361	0.792765537	-3.127951723	0.001760291	0.031103548
872	srg-17	9.924434509	2.649142347	0.793480537	3.733536118	0.00018881	0.007129432
873	srh-2	62.66112109	2.631787047	0.656436121	4.013849917	5.97E-05	0.003157194
874	srh-282	9.584085155	1.832887948	0.776765196	3.101912077	0.001922751	0.0326643
875	srh-30	78.89016803	1.795177742	0.603977903	2.974893752	0.0029309	0.04295727
876	srh-59	6.274082053	-2.577576837	0.777144571	-3.127498062	0.00176301	0.031103548
877	srh-75	68.91915397	2.134806352	0.606242913	3.515338793	0.000439193	0.012842164
878	sri-40	707.0004578	-2.83800594	0.619302807	-4.593457031	4.36E-06	0.000453527
879	srj-25	11.2564299	2.485705163	0.749228194	3.243116238	0.0011823	0.023927671
880	srp-1	1198.631901	-2.53542688	0.386053309	-6.566487793	5.15E-11	3.03E-08
881	srsx-40	26.64235228	-2.097580059	0.650933825	-3.215597353	0.001301733	0.025445654
882	srt-67	22.86111044	-1.759918152	0.526074019	-3.319769627	0.000900918	0.020548033
883	sru-12	9.049208454	1.82893806	0.776753016	3.06850703	0.002151313	0.034987341
884	sru-4	8.981396671	2.48114571	0.78734293	3.097492715	0.001951652	0.032892785
885	srw-17	37.36317036	2.029730406	0.650437802	3.109395258	0.001874707	0.032410773
886	srw-67	11.80577742	2.714338964	0.687291427	3.793468158	0.000148558	0.005999747
887	srw-71	49.46077272	2.282926224	0.532244728	4.266393705	1.99E-05	0.001372485
888	srx-42	6.129778268	2.227879326	0.791134884	3.184488907	0.001450099	0.027485064
889	ssp-19	723.0724586	-2.840902841	0.641144688	-4.449303828	8.61E-06	0.000725295
890	ssp-33	256.9454843	-1.996646093	0.679236435	-2.951335848	0.003164027	0.045096101
891	sss-1	7027.740779	-2.160380642	0.54966932	-3.932974406	8.39E-05	0.004007111
892	stdh-3	85.26865133	2.663958626	0.637812099	4.179237946	2.92E-05	0.00185116
893	str-112	38.97793766	3.174716801	0.542027434	5.742131381	9.35E-09	3.58E-06
894	str-138	11.39503799	-2.62298666	0.717694926	-3.471440287	0.000517674	0.014219158
895	str-143	9.550918246	-2.700727693	0.778184088	-3.412062257	0.000644734	0.016460265
896	str-146	92.4961631	-2.595919325	0.744271251	-3.532445839	0.000411735	0.012257907
897	str-204	120.4773398	2.098562823	0.587987493	3.57331436	0.000352491	0.011096422
898	str-262	18.35023277	-2.607469863	0.5906318	-4.274617185	1.91E-05	0.001350227
899	str-33	5.199019909	2.37202518	0.793241805	3.23321202	0.001224067	0.024369782
900	sul-1	477.4623166	-1.627912908	0.411859929	-3.952272026	7.74E-05	0.003787153
901	suro-1	2175.621034	-1.892953542	0.631529925	-3.002429901	0.002678336	0.040404145
902	tag-293	1090.429352	2.101545428	0.509690961	4.123655307	3.73E-05	0.002227718
903	tbh-1	316.0320463	-2.171316478	0.670725624	-3.248349052	0.001160768	0.02360793
904	tor-2	41.80420979	-2.049278642	0.527058106	-3.863905013	0.000111589	0.004918904
905	try-1	582.1941595	-2.143805267	0.694206985	-3.105616157	0.00189883	0.032613117
906	ttr-13	22.97179321	-2.440930392	0.586136817	-4.097621152	4.17E-05	0.002459192
907	ttr-14	16071.13206	-2.115348446	0.716735823	-2.976747197	0.002913241	0.042802418
908	twk-7	52.42371102	1.603462046	0.423695203	3.775927879	0.000159413	0.006272906
909	tyr-2	1430.402886	-2.315106167	0.604964584	-3.832494151	0.000126851	0.005377337
910	ubxn-5	1530.620563	-1.854817357	0.52808987	-3.513488078	0.000442264	0.0128498
911	ugt-15	97.19903125	3.027043524	0.704858797	4.314821113	1.60E-05	0.001147346
912	ugt-32	70.18402681	2.257971489	0.464929405	4.846974381	1.25E-06	0.000169337
913	ugt-37	2585.504676	2.536030134	0.659265603	3.865173661	0.00011101	0.004912947
914	ugt-38	90.59309467	2.254784964	0.690833704	3.27736002	0.001047827	0.022162851
915	ugt-4	610.6830189	2.28698262	0.629134459	3.643486602	0.00026897	0.009152125
916	ugt-43	307.3672575	-3.506479277	0.560510294	-6.239925464	4.38E-10	2.26E-07
917	ugt-6	1728.165688	-2.285826063	0.423047567	-5.403051706	6.55E-08	1.82E-05
918	ule-1	344.3814701	-3.687201015	0.760627441	-5.226073904	1.73E-07	3.69E-05
919	ule-2	3462.802897	-1.958520197	0.63600883	-3.085450495	0.002032441	0.033836002
920	ule-3	10352.64799	-1.941001946	0.78433269	-3.465246004	0.000529747	0.014462963
921	ule-4	25511.30137	-2.460877402	0.725549314	-3.439387379	0.000583032	0.01532389
922	vap-2	1240.086676	-3.799551135	0.707140781	-5.503782223	3.72E-08	1.10E-05
923	vglu-3	397.0266376	-1.804129575	0.539189528	-3.34602965	0.000819776	0.019473452
924	vit-2	29262.07758	-2.210029798	0.79231439	-3.514969313	0.000439805	0.012842164
925	vit-3	3237.79415	-1.703133734	0.772933069	-3.30923113	0.000935526	0.020866857
926	vit-6	27282.57005	-1.702325568	0.77715012	-2.972506214	0.002953792	0.043118222
927	wrt-8	949.7925548	-2.507565377	0.636715682	-3.950143482	7.81E-05	0.003800449
928	zig-3	283.0794632	1.668817581	0.43759319	3.811822842	0.000137946	0.005700812
929	zip-8	13.28838482	2.173043094	0.679321988	3.15535858	0.00160301	0.029279593
